# Supplementary material
Source: PubMed Central journal article supplement (PMC6593635)
Supplement: jama-321-2428-s001.pdf [file jama-321-2428-s001.pdf]

1  
2 **SMart Angioplasty Research Team:**  
3 **Comparison between P2Y12 Antagonist**  
4 **Monotherapy and Dual Antiplatelet Therapy**  
5 **in Patients Undergoing Implantation of**  
6 **Coronary Drug-Eluting Stents (SMART-**  
7 **CHOICE) Trial**

8  
9 **Principal Investigators:**

10  
11 Hyeon-Cheol Gwon, MD, PhD,  
12 Cardiac and Vascular Center, Samsung Medical Center,  
13 Sungkyunkwan University School of Medicine,  
14 50 Irwon-dong, Gangnam-gu, Seoul, 135-710, Republic of Korea  
15 Telephone: 82-2-3410-3418; Fax: 82-2-3410-3849  
16 E-mail: [hcgwon62@gmail.com](mailto:hcgwon62@gmail.com)  
17

18  
19  
20 **Data Monitoring / Management / Analysis:**

21  
22 **Clinical Trial Center (CTC)**

23 Samsung Medical Center  
24 50 Irwon-dong, Gangnam-gu,  
25 Seoul, 135-710, Republic of Korea  
26

27 **Clinical Events Adjudication Committee**

28 Hyun-Joong Kim, MD  
29 Byeong-Keuk Kim, MD  
30 Seung Jung Park, MD  
31

32 **Data Safety Monitoring Board**

33 Cheol Woong Yu, MD  
34 Seon Woo Kim, MS  
35 So Yeon Choi, MD  
36

37 Version 4.0 November 14, 2016

38  
39

## Table of Contents

|                                                        |       |           |
|--------------------------------------------------------|-------|-----------|
| <b>Table of Contents</b>                               | ..... | <b>2</b>  |
| <b>Protocol Summary</b>                                | ..... | <b>5</b>  |
| <b>1 Background</b>                                    | ..... | <b>6</b>  |
| <b>2 Study Objectives and Hypotheses</b>               | ..... | <b>6</b>  |
| 2.1 Objective                                          |       |           |
| 2.2 Hypothesis                                         |       |           |
| <b>3 Study Design</b>                                  | ..... | <b>6</b>  |
| 3.1 Study Design                                       |       |           |
| 3.2 Patient Enrollment                                 |       |           |
| 3.3 Patient Follow-up                                  |       |           |
| 3.4 Early Study Termination                            |       |           |
| 3.5 Measures to Avoid/Minimize Bias                    |       |           |
| <b>4 Endpoints</b>                                     | ..... | <b>7</b>  |
| 4.1 Primary Endpoint                                   |       |           |
| 4.2 Secondary Endpoints                                |       |           |
| 4.3 Study Timeline                                     |       |           |
| <b>5 Randomization</b>                                 | ..... | <b>7</b>  |
| 5.1 Randomization                                      |       |           |
| 5.2 Stratification                                     |       |           |
| <b>6 Patient Enrollment and Withdrawal</b>             | ..... | <b>8</b>  |
| 6.1 Patient Population                                 |       |           |
| 6.2 Patient Screening                                  |       |           |
| 6.3 Eligibility Criteria                               |       |           |
| 6.3.1 General Inclusion Criteria                       |       |           |
| 6.3.2 Angiographic Inclusion Criteria                  |       |           |
| 6.3.3 General Exclusion Criteria                       |       |           |
| 6.3.4 Angiographic Exclusion Criteria                  |       |           |
| 6.4 Patient Discontinuation (Withdrawal Criteria)      |       |           |
| 6.4.1 Lost to Follow-up                                |       |           |
| <b>7 Interventions / Protocol Procedures</b>           | ..... | <b>10</b> |
| 7.1 Schedule of Measurements                           |       |           |
| 7.2 Index PCI Procedure                                |       |           |
| 7.2.1 Index PCI                                        |       |           |
| 7.2.2 Adjunctive Pharmacological Therapy               |       |           |
| 7.2.3 Post-PCI                                         |       |           |
| 7.2.4 Staged PCI Procedures                            |       |           |
| 7.3 Lab tests, ECGs and Additional Hospital Procedures |       |           |

|           |                                                         |       |           |
|-----------|---------------------------------------------------------|-------|-----------|
| 7.4       | Timing of Discharge                                     |       |           |
| <b>8</b>  | <b>Post Index Procedure Management: FU Phase</b>        | ..... | <b>14</b> |
| 8.1       | Clinical Follow-up                                      |       |           |
| 8.2       | Additional Event-Driven Visits                          |       |           |
| 8.3       | Pharmacological Management and Risk Factor Intervention |       |           |
| <b>9</b>  | <b>Ethical Considerations and Confidentiality</b>       | ..... | <b>15</b> |
| 9.1       | Institutional Review Board / Ethical Committee          |       |           |
| 9.2       | Participant Safety                                      |       |           |
| 9.2.1     | Elements of Informed Consent                            |       |           |
| 9.2.2     | Potential Risks                                         |       |           |
| 9.2.3     | Adequacy of Protection Against Risks                    |       |           |
| 9.3       | Confidentiality                                         |       |           |
| <b>10</b> | <b>Study Organization</b>                               | ..... | <b>17</b> |
| 10.1      | Executive Committee                                     |       |           |
| 10.2      | Steering Committee                                      |       |           |
| 10.3      | Data Safety Monitoring Board                            |       |           |
| 10.4      | Clinical Event Adjudication Committee                   |       |           |
| 10.5      | Data Coordination and Site Management                   |       |           |
| <b>11</b> | <b>Statistical Analysis</b>                             | ..... | <b>17</b> |
| 11.1      | Statistical Overview                                    |       |           |
| 11.2      | Sample Size                                             |       |           |
| 11.3      | Randomization                                           |       |           |
| 11.4      | Analysis                                                |       |           |
| <b>12</b> | <b>Publication Policy</b>                               | ..... | <b>19</b> |
| 12.1      | Data Analysis and Release of Results                    |       |           |
| 12.2      | Review Process                                          |       |           |
| 12.3      | Authorship: Primary Outcome Paper                       |       |           |
| 12.4      | Other Study Papers, Abstracts, and Presentations        |       |           |
| <b>13</b> | <b>QA / QC / Clinical Monitoring</b>                    | ..... | <b>20</b> |
| 13.1      | Protocol Adherence                                      |       |           |
| 13.2      | Data Collection : Electronic Case Report Forms (eCRF)   |       |           |
| 13.3      | Training / Certification and Retraining                 |       |           |
| 13.4      | Site Monitoring                                         |       |           |
| <b>14</b> | <b>Core Labs</b>                                        | ..... | <b>21</b> |
| 14.1      | Angiographic Core Lab Measurements                      |       |           |
| <b>15</b> | <b>Adverse Events / SAE / UADE</b>                      | ..... | <b>22</b> |
| 15.1      | Adverse Events                                          |       |           |
| 15.2      | Serious Adverse Event                                   |       |           |
| 15.3      | Unexpected Adverse Device Effect                        |       |           |

|           |                                              |       |           |
|-----------|----------------------------------------------|-------|-----------|
| <b>16</b> | <b>Event Adjudication and Reporting</b>      | ..... | <b>23</b> |
| 16.1      | Investigator Responsibilities                |       |           |
| 16.1.1    | Averse Events                                |       |           |
| 16.1.2    | SAE / UADE                                   |       |           |
| 16.2      | Designee's Responsibility                    |       |           |
| 16.2.1    | Reporting Responsibilities                   |       |           |
| 16.2.2    | Endpoint and SAE/UADE Adjudication           |       |           |
| 16.2.3    | Device Failures and Malfunctions             |       |           |
| <b>17</b> | <b>Regulatory Responsibilities</b>           | ..... | <b>24</b> |
| 17.1      | Investigator Responsibilities                |       |           |
| 17.2      | IRB / EC Approval                            |       |           |
| 17.3      | Informed Consent                             |       |           |
| 17.4      | Study Coordinator                            |       |           |
| <b>18</b> | <b>Protocol Deviations and Amendments</b>    | ..... | <b>25</b> |
| 18.1      | Protocol Deviations                          |       |           |
| 18.2      | Protocol Amendments                          |       |           |
| <b>19</b> | <b>Records Retention and Reports</b>         | ..... | <b>26</b> |
| 19.1      | Records                                      |       |           |
| 19.2      | Reports                                      |       |           |
| <b>20</b> | <b>Investigational Agreement</b>             | ..... | <b>26</b> |
|           | <b>Appendix</b>                              | ..... | <b>28</b> |
|           | Appendix A: Definitions                      |       |           |
|           | Appendix B: Angiographic Core Lab Guidelines |       |           |
|           | <b>References</b>                            | ..... | <b>40</b> |

40  
41

42 **PROTOCOL SUMMARY**  
43

|                              |                                                                                                                                                                                                                                                                                                                                                                                                                                                                                                                                                                                                                                                                                                                                                                         |
|------------------------------|-------------------------------------------------------------------------------------------------------------------------------------------------------------------------------------------------------------------------------------------------------------------------------------------------------------------------------------------------------------------------------------------------------------------------------------------------------------------------------------------------------------------------------------------------------------------------------------------------------------------------------------------------------------------------------------------------------------------------------------------------------------------------|
| <b>Trial Name and Number</b> | Smart Angioplasty Research Team: <u>C</u> omparison between P2Y12 Antagonist Monot <u>H</u> erapy and Dual Antiplatelet Therapy in Patients Underg <u>O</u> ing <u>I</u> mplantation of <u>C</u> oronary Drug- <u>E</u> luting Stents (SMART-CHOICE) Trial                                                                                                                                                                                                                                                                                                                                                                                                                                                                                                              |
| <b>Objectives</b>            | To compare the efficacy and safety of P2Y12 antagonist monotherapy versus aspirin plus P2Y12 antagonist following 3-month of dual antiplatelet therapy (DAPT) in patients undergoing percutaneous coronary intervention (PCI) with drug-eluting stent (DES)                                                                                                                                                                                                                                                                                                                                                                                                                                                                                                             |
| <b>Study Design</b>          | Prospective, open label, two-arm, randomized multi-center trial to test the noninferiority of P2Y12 antagonist monotherapy compared with aspirin plus P2Y12 antagonist following 3-month of DAPT after DES implantation. Patients will be stratified by stent types (cobalt-chrome everolimus-eluting stents, platinum-chrome everolimus-eluting stents, and sirolimus-eluting stents with bioresorbable polymer) only for descriptive subgroup analysis. Patients will be further stratified by P2Y12 antagonist (clopidogrel, prasugrel, or ticagrelor), clinical presentation (acute coronary syndrome) and investigational center.                                                                                                                                  |
| <b>Patient Enrollment</b>    | 3,000 patients will be enrolled at 33 centers in South Korea.                                                                                                                                                                                                                                                                                                                                                                                                                                                                                                                                                                                                                                                                                                           |
| <b>Patient Follow-Up</b>     | Clinical follow-up will occur at 3, 6 and 12 months, and at 2 and 3 years. Investigator or designee may conduct follow-up as telephone contacts or office visits.                                                                                                                                                                                                                                                                                                                                                                                                                                                                                                                                                                                                       |
| <b>Primary Endpoint</b>      | A composite of death, myocardial infarction, or cerebrovascular events at 12 months after the index procedure                                                                                                                                                                                                                                                                                                                                                                                                                                                                                                                                                                                                                                                           |
| <b>Secondary Endpoints</b>   | <ol style="list-style-type: none"> <li>1) Each component of primary endpoint at 12-month</li> <li>2) Cardiac death at 12-month</li> <li>3) Target lesion revascularization (TLR) at 12-month</li> <li>4) Target vessel revascularization (TVR) at 12-month</li> <li>5) Any revascularization at 12-month</li> <li>6) Stent thrombosis at 12-month: definite or probable stent thrombosis by ARC definition</li> <li>7) BARC bleeding <math>\geq 3</math> at 12-month</li> <li>8) BARC bleeding <math>\geq 2</math> at 12-month</li> <li>9) Major adverse cardiac and cerebrovascular events (death, MI, cerebrovascular event, or any revascularization [MACCE]) at 12-month</li> <li>10) Each component of primary and secondary endpoints at 2- and 3-year</li> </ol> |

44 **1 Background**

45  
46 Current guidelines recommend 6 to 12 months of dual antiplatelet therapy (DAPT; aspirin plus P2Y12  
47 antagonist) in patients undergoing percutaneous coronary intervention (PCI) with drug-eluting stents  
48 (DES).<sup>1,2</sup> However, these recommendations are not based on randomized studies, but data from several  
49 registries with the 1st generation DES.<sup>3,4</sup> In randomized studies, prolonged DAPT longer than 12 months did  
50 not improve clinical outcomes compared with aspirin monotherapy,<sup>5</sup> and 6-month DAPT was noninferior to  
51 12-month or longer DAPT in reducing adverse cardiac events.<sup>6,7</sup> Considering improved safety of the  
52 currently used 2nd generation DES compared with the 1st generation DES,<sup>8,9</sup> the minimum required duration  
53 of DAPT can be shortened. A recent large randomized study reported that shorter duration (3 months) of  
54 DAPT is noninferior to prolonged duration (12 months) of DAPT.<sup>10</sup> Prolonged DAPT increases bleeding  
55 risk<sup>11,12</sup> and cost. Endoscopic, dental, and surgical procedures are often delayed due to prolonged DAPT,  
56 which may affect the patient's quality of life.<sup>13</sup> Therefore, to determine the optimal or minimal necessary  
57 duration of DAPT is very important.

58  
59 The other important issue is that which antiplatelet agent is more appropriate after DAPT. Aspirin  
60 monotherapy has been recommended traditionally.<sup>1,2</sup> However, there is no randomized comparison study  
61 between aspirin monotherapy versus clopidogrel monotherapy after DAPT in patients undergoing PCI with  
62 DES. In CAPRIE trial, clopidogrel showed a superior efficacy in preventing ischemic events compared with  
63 aspirin.<sup>14</sup> Moreover, the incidence of gastrointestinal bleeding was significantly lower with clopidogrel than  
64 with aspirin. Clopidogrel monotherapy can reduce ischemic events and bleeding risk compared with aspirin  
65 monotherapy.

66  
67 Therefore, in the SMART-CHOICE trial we will test noninferiority of P2Y12 antagonist monotherapy  
68 compared with aspirin plus P2Y12 antagonist after 3-month of DAPT.

69  
70

71 **2 Study Objectives and Hypotheses**

72 **2.1 Objective**

73 To compare the efficacy and safety of P2Y12 antagonist versus aspirin plus P2Y12 antagonist  
74 following 3-month of dual antiplatelet therapy (DAPT) in patients undergoing PCI with DES

75

76 **2.2 Hypothesis**

77 P2Y12 antagonist monotherapy is noninferior to aspirin plus P2Y12 antagonist in reducing  
78 ischemic events and bleeding risk after 3-month DAPT.

79

80 **3 Study Design**

81 **3.1 Study Design**

82 Prospective, open label, two-arm, randomized multi-center trial to test the noninferiority of P2Y12  
83 antagonist monotherapy compared with aspirin plus P2Y12 antagonist following 3-month of DAPT after  
84 DES implantation. Patients will be stratified by stent types (cobalt-chrome everolimus-eluting stents,  
85 platinum-chrome everolimus-eluting stents, and sirolimus-eluting stents with bioresorbable polymer) only  
86 for descriptive subgroup analysis. Patients will also be stratified by P2Y12 antagonist (clopidogrel,  
87 prasugrel, or ticagrelor), clinical presentation (acute coronary syndrome) and investigational center.

88

89 **3.2 Patient Enrollment**

90 A total of 3,000 patients will be enrolled at 33 centers in South Korea. Patients undergoing PCI with DES  
91 will be eligible. After successful PCI with DES, all eligible patients will be randomized either to P2Y12  
92 antagonist monotherapy or to aspirin plus P2Y12 antagonist following 3-month of DAPT.

93  
94  
95  
96  
97  
98  
99  
100  
101  
102  
103  
104  
105  
106  
107  
108  
109  
110  
111  
112  
113  
114  
115  
116  
117  
118  
119  
120  
121  
122  
123  
124  
125  
126  
127  
128  
129  
130  
131  
132  
133  
134  
135  
136  
137  
138  
139  
140  
141

### **3.3 Patient Follow-up**

Clinical follow-up will occur at 3, 6 and 12 months, and at 2 and 3 years after intervention. The investigator may conduct follow-up as telephone contacts or office visits.

### **3.4 Early Study Termination**

No statistical rule for early trial termination is defined and this study will not be stopped early based on efficacy results. An independent Data Safety Monitoring Board (DSMB) will review the safety data including death, MI, stroke or other serious adverse events. The DSMB will be powered to recommend suspension of enrollment or termination of the study based on safety concerns (refer to section 10.3 Data Safety Monitoring Board). The Executive Committee will make the final decision for early study termination based on DSMB recommendations.

### **3.5 Measures to Avoid/Minimize Bias**

In order to minimize bias in assessing clinical events, an independent Clinical Event Adjudication Committee (CEAC) (refer to section 10.4 Clinical Event Adjudication Committee) and DSMB (refer to section 10.3 Data Safety Monitoring Board) will be established. In addition, all angiographic analysis data will be obtained from an independent core laboratory in South Korea. Data management will be performed by an independent data management core center, and a web based electronic case report form (eCRF) and a web-based online randomization program will be utilized. Restricted access to the data management system will be maintained throughout the trial period.

## **4 Endpoints**

### **4.1 Primary Endpoint:**

A composite of death, myocardial infarction [MI], or cerebrovascular events at 12 months after index procedure for comparison of P2Y12 antagonist monotherapy vs. aspirin plus P2Y12 antagonist therapy

### **4.2 Secondary Endpoints:**

- 1) Each component of primary endpoint at 12-month
- 2) Cardiac death at 12-month
- 3) Target lesion revascularization (TLR) at 12-month
- 4) Target vessel revascularization (TVR) at 12-month
- 5) Any revascularization at 12-month
- 6) Stent thrombosis at 12-month: definite or probable stent thrombosis by ARC definition
- 7) BARC bleeding  $\geq 3$  at 12-month
- 8) BARC bleeding  $\geq 2$  at 12-month
- 9) Major adverse cardiac and cerebrovascular events (death, MI, cerebrovascular event, or any revascularization [MACCE]) at 12-month
- 10) Each component of primary and secondary endpoints at 2- and 3-year

### **4.3 Study Timeline:**

Overall study will require 6-6.5 years to complete, including 3 months' preparation, 3 year of recruitment and 3 years of follow-up followed by close out and reporting of final results.

## **5 Randomization**

### **5.1 Randomization**

Patients will be randomized according to the type of antiplatelet therapy.

142  
143  
144  
145  
146  
147  
148  
149  
150  
151  
152  
153  
154  
155  
156  
157  
158  
159  
160  
161  
162  
163  
164  
165  
166  
167  
168  
169  
170  
171  
172  
173  
174  
175  
176  
177  
178  
179  
180  
181  
182  
183  
184  
185  
186  
187  
188  
189

Randomization of the type of antiplatelet therapy will be done 1:1:

- a) P2Y12 antagonist monotherapy
- b) Aspirin plus P2Y12 antagonist therapy

**5.2 Stratification**

To ensure balance among the strata, randomization will be stratified by the following factors:

- a) Acute coronary syndrome
- b) Enrolling sites
- c) Stent types : cobalt-chrome everolimus-eluting stents (Xience Prime™ stents, Xience Expedition™ stents, or Xience Alpine™ stents), platinum-chrome everolimus-eluting stents (Promus™ Element™ stents, Promus™ Premier™ stents, or Synergy stents), or sirolimus-eluting stents with bioresorbable polymer (Orsiro, Biotronik)
- d) P2Y12 antagonist :clopidogrel, prasugrel, or ticagrelor

**6 PATIENT ENROLLMENT AND WITHDRAWAL**

**6.1 Patient Population**

A total of 3,000 patients derived from a population of Korean patients receiving PCI for coronary artery disease will be enrolled in the present trial. It is recommended that each enrolling investigator review the most recent instructions for use (IFU) and assess the contraindications, warnings, and precaution sections for treating potential patients.

**6.2 Patient Screening**

Consecutive patients presenting at participating centers will be evaluated for the entry into the study. All consecutive patients undergoing PCI with DES should be invited to participate in the study. A member of each research team should review the patients' medical history for eligibility. If all eligibility criteria are met and written informed consent is provided, the patient may be enrolled in the study. In all cases, the final decision regarding eligibility for randomization in the trial of all target vessels will be the responsibility of the interventional investigator based upon clinical factors and review of the initial angiogram. Patients will be entered into the electronic Case Report Form (eCRF) only after informed consent has been obtained.

**6.3 Eligibility Criteria**

**6.3.1 General Inclusion Criteria**

- a) Subject must be at least 20 years of age.
- b) Subject is able to verbally confirm understandings of risks, benefits and treatment alternatives of receiving P2Y12 antagonist monotherapy or aspirin plus P2Y12 antagonist and he/she or his/her legally authorized representative provides written informed consent prior to any study related procedure.
- c) Patients should have undergone successful percutaneous coronary intervention with drug-eluting stent for stable ischemic heart disease or acute coronary syndrome



190 d) Patients must have one or more coronary stenosis of 50% or more in a native coronary artery  
191 with visually estimated diameter of  $\geq 2.25$  mm and  $\leq 4.25$  mm eligible for stent implantation.  
192

193 e) Target lesion(s) must be amenable for percutaneous coronary intervention  
194  
195

### 196 6.3.2 General Exclusion Criteria

197 a) Hemodynamic instability or cardiogenic shock

198 b) Active bleeding

199 c) Known hypersensitivity or contraindication to study medications

200 d) Female of childbearing potential, unless a recent pregnancy test is negative, who possibly plan to  
201 become pregnant any time after enrollment into this study

202 e) Non-cardiac co-morbid conditions are present with life expectancy  $< 2$  year or that may result in  
203 protocol non-compliance (per site investigator's medical judgment).

204 f) DES implantation within 12 months before index procedure  
205

### 206 6.4 Patient Discontinuation (Withdrawal Criteria)

207 Once enrolled, each patient should remain in the study until the required follow-up period is  
208 complete. However, all patients have the right to withdraw at any point during the study without penalty or  
209 loss of benefit. The investigator may discontinue any patient at any time if medically necessary. Data  
210 obtained to the last follow-up will be used for the analysis. It will be documented whether or not each  
211 patient completed the clinical study. If the study treatment(s) or observations are discontinued in any  
212 patient, the reason will be recorded and the data coordinating center must be notified promptly.  
213

214 The following events will result in terminating the patient's follow-up:

- 215 • Patient death
- 216 • Patient voluntary withdrawal
- 217 • Patient withdrawn by investigator as clinically indicated
- 218 • Patient lost to follow-up (unofficial withdrawal)

219  
220 It is imperative to obtain complete follow-up data for all patients, whether or not they receive their  
221 assigned treatment. Every attempt should be made to collect follow-up information, except for those patients  
222 who specifically withdraw consent for release of such information. All procedures and laboratory  
223 specimens or tests requested for evaluation after enrollment in the study should be carried out when possible,  
224 whether or not a patient continues to receive treatment according to the protocol. Patients will not be  
225 replaced in this trial.  
226

#### 227 6.4.1 Lost to Follow-up

228  
229 Patients that do not complete the scheduled follow-up visits and have not officially withdrawn from the  
230 study are considered lost to follow-up; this term does not apply to missed visits. Site personnel should make  
231 considerable effort to locate and communicate with the patient using all available methods (eg, telephone,  
232 emails, and postcards). The following contact procedure is recommended at each time point:  
233

234 • A minimum of 2 telephone calls on different days over the specified follow-up windows should be  
 235 recorded in the source documentation including date, time, and site personnel initials for staff  
 236 attempting to contact the patient.

237 • If these attempts are unsuccessful, a certified letter should be sent to the patient.

238  
 239 If the patient misses 2 consecutive scheduled contact time points and the above mentioned attempts at  
 240 communicating with the patient are unsuccessful, the patient will be considered lost to follow-up.

241  
 242 **7 Interventions/ Protocol Procedures**

243  
 244 After the patient has been enrolled in the present study, the following procedures will take place. The  
 245 schedule of events for this trial is located in section 7.1 Schedule of Events. The treatment strategy will be  
 246 determined by the study-certified interventional operator. It is recommended that each enrolling investigator  
 247 review the most recently updated instructions for use (IFU) and assess the contraindications, warnings, and  
 248 precaution sections for treating potential patients. During the index procedure and appropriate medical  
 249 follow up, it is recommended that enrolling investigators try to adhere to the following guidelines when  
 250 applicable:

251  
 252 • 2011 ACCF/AHA/SCAI Guideline for Percutaneous Coronary Intervention: A Report of the American  
 253 College of Cardiology Foundation/American Heart Association Task Force on Practice Guidelines and the  
 254 Society for Cardiovascular Angiography and Interventions<sup>15</sup>

255 • 2007 Focused Update of the ACC/AHA/SCAI 2005 Guideline Update for Percutaneous Coronary  
 256 Intervention.<sup>16</sup>

257 • AHA/ACCF Secondary Prevention and Risk Reduction Therapy for Patients With Coronary and Other  
 258 Atherosclerotic Vascular Disease: 2011 Update. A Guideline From the American Heart Association and  
 259 American College of Cardiology Foundation *Endorsed by the World Heart Federation and the Preventive  
 260 Cardiovascular Nurses Association.*<sup>17</sup>

261 • Third Report National Cholesterol Education Program Expert Panel on Detection, Evaluation, and  
 262 Treatment of High Blood Cholesterol in Adults (Adult Treatment Panel III or ATP III Guidelines)<sup>18</sup>

263 • The Seventh Report of the Joint National Committee (JNC) on Prevention, Detection, Evaluation, and  
 264 Treatment of High Blood Pressure.<sup>19</sup>

265 • 2009 Focused Updates: ACC/AHA Guidelines for the Management of Patients With ST-Elevation  
 266 Myocardial Infarction (Updating the 2004 Guideline and 2007 Focused Update) and ACC/AHA/SCAI  
 267 Guidelines on Percutaneous Coronary Intervention (Updating the 2005 Guideline and 2007 Focused Update)  
 268 A Report of the American College of Cardiology Foundation/American Heart Association Task Force on  
 269 Practice Guidelines.<sup>20</sup>

270 • 2011 ACCF/AHA Focused Update Incorporated Into the ACC/AHA 2007 Guidelines for the Management  
 271 of Patients With Unstable Angina/Non–ST-Elevation Myocardial Infarction: A Report of the American  
 272 College of Cardiology Foundation/American Heart Association Task Force on Practice Guidelines.<sup>21</sup>

273  
 274  
 275 **7.1 Schedule of Events**

|  |                |                    |           |    |     |    |    |
|--|----------------|--------------------|-----------|----|-----|----|----|
|  | Screening<br>& | Post-<br>Procedure | Follow up |    |     |    |    |
|  |                |                    | 3M        | 6M | 12M | 2Y | 3Y |

**Confidential and Proprietary**

**Do not distribute or reproduce without prior written permission of the SMART CHOICE Investigators**

|                                       | Baseline       |                | 3<br>Months<br>±30 days | 6<br>Months<br>±30 days | 12<br>Months<br>±30 days | 2<br>Years<br>±30 days | 3<br>Years<br>±30 days |
|---------------------------------------|----------------|----------------|-------------------------|-------------------------|--------------------------|------------------------|------------------------|
| Informed consent                      | X <sup>1</sup> |                |                         |                         |                          |                        |                        |
| Inclusion/Exclusion Criteria          | X              |                |                         |                         |                          |                        |                        |
| Demography/ Medical History           | X <sup>2</sup> |                |                         |                         |                          |                        |                        |
| Randomization                         | X              |                |                         |                         |                          |                        |                        |
| Prescription for antiplatelet         | X              | X              | X                       | X                       | X                        | X                      |                        |
| Drug Compliance                       |                |                | X                       | X                       | X                        | X                      | X                      |
| Adverse events <sup>4</sup>           |                |                | X                       | X                       | X                        | X                      | X                      |
| Serious Adverse Event                 |                |                | X                       | X                       | X                        | X                      | X                      |
| 12 lead ECG                           | X <sup>5</sup> |                |                         |                         |                          |                        |                        |
| Coronary angiogram                    | X              |                |                         |                         |                          |                        |                        |
| CBC                                   | X              |                | X                       |                         |                          |                        |                        |
| Creatinine, BUN                       | X              |                | X                       |                         |                          |                        |                        |
| hs-CRP                                | X              |                | X                       |                         |                          |                        |                        |
| Total cholesterol, LDL cholesterol    | X              |                | X                       |                         |                          |                        |                        |
| Fasting glucose level                 | X <sup>6</sup> |                |                         |                         |                          |                        |                        |
| Pregnancy test, Urine (if applicable) | X              |                |                         |                         |                          |                        |                        |
| CPK, CK-MB, Troponin I                | X              | X <sup>7</sup> |                         |                         |                          |                        |                        |
| VeryfyNow-PRU/ARU                     |                |                | X                       |                         |                          |                        |                        |
| Echocardiogram                        |                | X              |                         |                         |                          |                        |                        |

276  
277  
278  
279  
280  
281  
282  
283  
284  
285  
286  
287  
288  
289  
290

<sup>1</sup> The informed consent should be signed prior to the diagnostic angiogram, but is can be signed after the diagnostic angiogram in the urgent situation.

<sup>2</sup> Assessment of Age, Sex, Risk factors, Clinical diagnosis, Angina status, Cardiac history, Cardiocerebral event and bleeding

<sup>3</sup> For patients undergoing stent implantation

<sup>4</sup> Assessment of Cardiocerebral event and bleeding, especially

<sup>5</sup> ECG at follow up visits will only be obtained when clinically indicated such as recurrent chest pain, ischemia, or significant arrhythmias, heart failure or other signs or symptoms of clinical instability.

<sup>6</sup> It may be done later, before discharge when the patient is in a fasting state

<sup>7</sup> Optional in selected centers and if baseline lab is done, enzymes must be followed every 8-hours for 24 hours post-index procedure

**7.2 Index PCI Procedure**

291 **7.2.1 Index PCI**

292 PCI will be performed according to standard procedure. After successful PCI, all eligible patients will  
293 be randomized either to P2Y12 antagonist monotherapy group or to aspirin plus P2Y12 antagonist group.  
294 Randomization will be performed with a Web-based response system and stratified per hospital, stent types,  
295 and clinical presentation (acute coronary syndrome or not). All patients will receive cobalt-chrome  
296 everolimus-eluting stents (Xience Prime™ stents, Xience Expedition™ stents, or Xience Alpine™  
297 stents), platinum-chrome everolimus-eluting stents (Promus™ Element™ stents, Promus™ Premier™  
298 stents, or Synergy stents), or sirolimus-eluting stents with bioresorbable polymer (Orsiro, Biotronik).

300 **7.2.2 Adjunctive Pharmacological Therapy**

301 **Pre-procedure:**

302 Aspirin: Aspirin in dose 300 mg po must be administered at least 24 hours before the index PCI,  
303 whether or not patient was taking Aspirin at home. Aspirin will be further continued at 100-325 mg PO  
304 indefinitely.

305  
306 P2Y12 antagonist: It will be recommended that patients receive oral 300 mg or 600 mg loading dose of  
307 clopidogrel at least 12 hours before the index PCI if the patient was not taking clopidogrel prior to  
308 admission. However, if the administration of a loading dose was not possible 12 hours in advance, a  
309 600mg loading dose of clopidogrel will be acceptable given in the catheterization lab prior to  
310 intervention. Post-procedure, the treatment should be continued 75 mg PO per day for the designated  
311 period of either 6-month or 12-month or longer. The use of additional antiplatelet combination (i.e.,  
312 cilostazol) will not be allowed. If patients present with acute coronary syndromes, prasugrel 60 mg or  
313 ticagrelor 180 mg can be used instead of clopidogrel.

314  
315 **In the cardiac catheterization laboratory:**

316 Unfractionated heparin, dosage per label instructions and local standard of care (target ACT  
317 250sec) will be administered. The use of combination with the glycoprotein GPIIb/IIIa inhibitor  
318 abciximab will be left to discretion of the operator. The standard dose of abciximab (0.25 mg/kg initial  
319 bolus 15 minutes pre-PCI, followed by infusion of 0.125 mcg/kg/minute at a maximum of 10  
320 mcg/minute) will be prescribed. Post procedure, no more heparin is recommended, and abciximab  
321 should be continued for 12 hours.

322  
323 **Post procedure and after discharge**

324 Aspirin 100mg plus P2Y12 antagonist daily or P2Y12 antagonist daily following 3-month  
325 DAPT will be given according to the randomization. For patients with stents requiring anticoagulation  
326 (chronic atrial fibrillation, deep vein thrombosis, left ventricular thrombi for example) it is  
327 recommended that investigators follow the ACC/AHA STEMI guidelines for triple therapy after  
328 stenting, which include ASA, Clopidogrel, and Warfarin. The goal of Warfarin therapy should be an  
329 INR of 2.0-2.5. Patients, who prematurely discontinue antiplatelet therapy secondary to significant  
330 active bleeding or for other procedures, should be monitored carefully for cardiac events and, once  
331 stabilized, their antiplatelet therapy should be restarted as soon as possible.

332  
333 **7.2.3 Post-PCI**

334 The patient may be monitored in the coronary care unit or angioplasty unit as per institutional  
335 routine.

336 **Sheath removal and ambulation.**

337  
338  
339

340 Any non-investigational closure devices may be used at operator discretion, in which case sheaths  
341 may be removed immediately following the procedure and the patient ambulated as per standard of care. If  
342 closure devices are not used, sheath(s) should be removed and manual compression applied: In patients  
343 receiving to heparin ± GP IIb/IIIa inhibitors: when the ACT falls below 170 seconds. As protracted sheath  
344 dwell times are a major risk for bleeding, sheath removal should not be prolonged beyond these guidelines,  
345 especially in the presence of GP IIb/IIIa infusion.

346 Patients receiving GP IIb/IIIa inhibitors should be at strict bed rest until the infusion is complete.  
347 Two hours post-infusion discontinuation (and at least 6 hours after sheath removal), the patient may be  
348 mobilized and ambulated progressively as per standard of care. For patients not receiving GP IIb/IIIa  
349 inhibitors, slow progressive mobilization and ambulation may begin within 4 hours after hemostasis, as per  
350 usual standard of care.

351

#### 352 **7.2.4 Staged PCI Procedures**

353 Either in the planning stages or during the course of multivessel angioplasty it may be advantageous  
354 to perform a "staged procedure" defined as serial interventional procedures either during the same  
355 hospitalization or during different hospitalizations to achieve complete revascularization. Staged PCI may be  
356 required due to renal insufficiency precluding excessive radiocontrast agent use, intra-procedural  
357 complications obviating continuation of the complete planned PCI, or other patient related factors limiting  
358 single procedure time. A staged procedure may be either planned (declared prior to the procedure as a  
359 component of declared PCI strategy) or provisional (declared during procedure due to operator discretion  
360 and for specific reasons), but must be declared prior to finishing the initial index procedure. Staged  
361 procedure should not be confused with clinically-driven repeat revascularization procedures on index target  
362 lesions during or after the initial hospitalization, and should not be counted as part of the primary outcome  
363 endpoint. After the first staged procedure, the next planned staged procedure should be completed within 4  
364 weeks of randomization. In the next stage procedure, the same allocated stent should be used. The 30-day  
365 follow-up visit should be performed  $30 \pm 7$  days following the day of the final stage of a staged index PCI.

366

### 367 **7.3 Lab tests, ECGs and additional hospital procedures**

368

#### 369 **Cardiac enzymes:**

370 In selected participating centers, in addition to the baseline measures, samples for CK, CK-MB and  
371 Troponin I/T analyses should be obtained at  $8 \pm 2$  hours,  $16 \pm 2$  hours, and at  $24 \pm 2$  hours post-index  
372 procedure, and post any additional PCI or CABG procedures. The peak CPK, CPK-MB and TroponinI/T  
373 will be recorded. If the patient develops recurrent chest pain, ischemia, significant arrhythmias, heart failure  
374 or other signs or symptoms of clinical instability, additional cardiac enzymes, including CPK, CK-MB and  
375 Troponins, should be obtained.

376

#### 377 **Serum creatinine:**

378 In addition to the baseline value, samples for serum creatinine will be obtained daily post-procedure  
379 for two days (minimum) if the baseline calculated creatinine clearance  $< 60$ ml/min using the MDRD  
380 formula. It is recommended that if the serum creatinine is elevated by  $\geq 0.3$  mg/dl from baseline, daily  
381 creatinine levels should be measured until renal function is improving.

382

#### 383 **ECGs:**

384 In addition to the baseline ECG, additional ECGs will be performed at  $60 \pm 30$  minutes post-procedure. An  
385 ECG will be obtained at follow-up visits only if clinically indicated.

386

## 387 7.4 Timing of Discharge

388 Patients may be considered stable for discharge if all of the following are present:

389

- 390 • They have had no chest pain consistent with ischemia
- 391 • They have had no signs or symptoms of congestive heart failure
- 392 • They have had no significant ventricular arrhythmias (ventricular tachycardia or symptomatic
- 393 ectopy)
- 394 • They are ambulating without limitation, and
- 395 • Heparin and GP IIb/IIIa inhibitors have been discontinued for at least 12 hours.

396

## 397 8 Post Index Procedure Management: Follow-up phase

398

### 399 8.1 Clinical follow-up

400

401 Clinical follow-up will occur at the following time points:

| Follow-up time point | ± days |
|----------------------|--------|
| 3 months             | 30     |
| 6 months             | 30     |
| 12 months            | 30     |
| 2 years              | 30     |
| 3 years              | 30     |

402

403

404 Follow-ups should be office visits but telephone contact will be allowed. Data collected during all  
 405 follow-up visits will include angina class and major adverse ischemic, neurologic and bleeding events,  
 406 including re-hospitalization and re-catheterization and Adverse Events/ Serious Adverse Events. Original  
 407 source documents must be submitted for any clinical events (death, reinfarction, stent thrombosis,  
 408 revascularization, bleeding, stroke, or any other SAE within 1 year). If the patient is readmitted to a non-  
 409 study hospital, all possible efforts should be made to obtain original source documents from that hospital.  
 410 For all reinfarctions, ECGs and cardiac enzymes (CPK, CK-MB, troponin) must be obtained and recorded.

411

### 411 8.2 Additional Event-Driven Visits

412

413 Additional event-driven visits may occur as clinically warranted. The following data should be  
 414 collected at these visits:

415

- 416 • Clinical events including death, MI, revascularization, bleeding, cerebrovascular events, and stent
- 417 thrombosis. Also, AE related data including laboratory test results, ECG, details, and
- 418 subsequent coronary angiography results
- 419 • Patient compliance and therapy interruptions with adjunctive antiplatelet therapy and major
- 420 bleeding complications
- 421 • Chronic concomitant medication

422

423

### 424 8.3 Pharmacological Management and Risk Factors Interventions

425

426 Optimal pharmacological management will be given to all patients enrolled the study. In particular, it  
 will be advised to each investigator to emphasize the importance of cardiovascular risk-factor modification.

427 Applicable investigators should try to follow the most up to date guidelines in pharmacologic management  
428 and secondary prevention.  
429

- 430 • AHA/ACCF Secondary Prevention and Risk Reduction Therapy for Patients With Coronary and Other  
431 Atherosclerotic Vascular Disease: 2011 Update. A Guideline From the American Heart Association and  
432 American College of Cardiology Foundation *Endorsed by the World Heart Federation and the Preventive*  
433 *Cardiovascular Nurses Association*.<sup>17</sup>
- 434 • Third Report National Cholesterol Education Program Expert Panel on Detection, Evaluation, and  
435 Treatment of High Blood Cholesterol in Adults (Adult Treatment Panel III or ATP III Guidelines)<sup>18</sup>
  - 436 • The Seventh Report of the Joint National Committee (JNC) on Prevention, Detection, Evaluation, and  
437 Treatment of High Blood Pressure.<sup>19</sup>

438

## 439 **9 Ethical Considerations and Confidentiality**

### 440 **9.1 Institutional Review Board (IRB) / Ethical Committee Approval**

441

442 Institutional Review Board / Ethical Committee approval for the protocol and informed consent  
443 form will be obtained by the investigator prior to study participation. The approval letter must be signed  
444 by the IRB Chairperson or authorized representative prior to beginning the present study. No changes  
445 will be made to the protocol or informed consent form without appropriate approval from the IRB.  
446 According to IRB requirements, the investigator will report study progress until it is completed. Further,  
447 any protocol amendments as well as associated informed consent changes will be submitted to the IRB  
448 and written approval must be obtained prior to implementation.  
449

449

### 450 **9.2 Participant Safety**

#### 451 **9.2.1 Elements of Informed Consent**

452 This trial will involve patients with significant coronary artery disease who have been deemed  
453 eligible for coronary revascularization. We anticipate enrolling 3,000 patients with a mean age in the  
454 60s. Pregnant women and patients under the age of 20 will be excluded from the trial for ethical and  
455 safety concerns. Women of child-bearing potential must have a negative serum/urine pregnancy test  
456 prior to enrollment and sexually-active females must use contraception for up to 1-year following the  
457 index procedure.

458 Prior to collecting study data, the details of the study will be explained to the participant  
459 including: (1) that the study represents a phase IV clinical trial, (2) that participation is voluntary, and  
460 there is no penalty for withdrawal, (3) anticipated costs to the patient for participation, (4) potential  
461 risks and benefits for participation, and (5) contact information for additional concerns. Patients are  
462 informed of the purpose of the study, the treatment alternative, the random manner of assignment to  
463 treatment, the need to be available for telephone follow-up and return clinic visits at regular intervals  
464 for questionnaires and/or medical tests, and of their options to accept or refuse entry into the study  
465 without affecting their clinical care.

466 All patients or legally authorized patient representatives must sign the current IRB approved  
467 informed consent form prior to any study-related activities and the index procedure. Failure to obtain  
468 signed informed consent will render the patient ineligible for the study. The signed informed consent  
469 will be kept in the patient's medical records and a copy given to the patient or legally authorized  
470 patient representative.

471 All sources of research materials will be in the form of medical records, coronary angiograms,  
472 electrocardiograms and routine blood work. This material will be obtained both for routine medical care  
473 as well as for research purposes.  
474

475  
476  
477  
478  
479  
480  
481  
482  
483  
484  
485  
486  
487  
488  
489  
490  
491  
492  
493  
494  
495  
496  
497  
498  
499  
500  
501  
502  
503  
504  
505  
506  
507  
508  
509  
510  
511

## 9.2.2 Potential Risks

### Risks of PCI with Stent Implantation

Stents are metallic foreign bodies, which remain in the artery indefinitely. Complications that may be associated with stenting include, but are not limited to thrombosis with reinfarction and even death, intramural hematoma, side branch occlusion, stroke, stent migration, arterial rupture/perforation, dissection, embolization, and stent deformability. The risk of stent thrombosis is amplified by early discontinuation of antiplatelet therapy post procedure. Evidence suggests that the incidence of these complications after coronary stenting is low. Stent thrombosis is a complication that is well described in the coronary and peripheral interventional literature. Several causes of stent thrombosis have been documented and there are effective strategies for minimizing this complication. Stent delivery by the operator to the target site is an important determinant of thrombosis. Proper apposition of the stent to the arterial wall with minimal residual narrowing reduces the risk of thrombosis. Treatment with aspirin and clopidogrel also reduces the incidence of stent thrombosis. As a result, thrombosis is distinctly uncommon with proper operator technique and use of antiplatelet medication. Stent migration may occur but is uncommon. Endovascular snares have been developed to deal with this problem. In the majority of cases, experienced operators retrieve stents that have migrated, without permanent complications. Arterial rupture is rare. Proper device selection as well as the choice of inflation pressure effectively minimizes this complication. Stenting has been successfully performed for over 20 years.

### Pharmacological Risks

Patients treated with stents will be given aspirin and clopidogrel to try to minimize the likelihood of thrombus formation at the stent site. Aspirin, however, may increase the likelihood of gastrointestinal adverse effects and bleeding. Clopidogrel is uncommonly associated with rash, headache, dizziness, stomach pain, nausea, diarrhea, indigestion, increase in cholesterol levels, leucopenia, or thrombocytopenia. The anticoagulation medication used also involves additional risks. Hemorrhage (at any site) is the chief complication associated with heparin therapy. A higher incidence of bleeding has reported in patients, particularly women, over 60 years of age. It has also been reported that that patients on heparin may develop new thrombus formation in association with thrombocytopenia resulting from irreversible aggregation of platelets induced by Heparin, the so called "white clot syndrome". The process may lead to severe thrombo-embolic complications, like skin necrosis, gangrene of the extremities that may lead to amputations, pulmonary embolism, stroke, and possibly death. Therefore heparin administration should be promptly discontinued if a patient develops new thrombosis associated with a reduction in low platelet count.

## 9.2.3 Adequacy of Protection against Risks

The Data Coordinating Center (DCC), CEAC, and the DSMB play key roles in detecting any hazards the study may pose for its participants. Data are routinely collected and regularly monitored to document morbidity or mortality associated with study-related procedures in each clinic. Serious adverse events must be reported to the DCC within 24 hours. Timely reports will be made to the DSMB. In addition, the DCC is responsible for calling the Board's attention to significant interim safety concerns. Results for the different clinics are compared to identify the sources and causes of any trends deviating from the average performance.

The DSMB is responsible for advising early termination of the trial in the event if there are non-rectifiable, serious safety concerns in any groups. It will be the responsibility of the DSMB to review the data and establish limits of safety for the trial, as well as its termination, however, the final decision on the



523 early termination of the study will be made by the executive committee upon the recommendations of the  
524 DSMB. This study will not be stopped early based on efficacy results.

525  
526 **9.3 Confidentiality**  
527 The confidentiality of protected health information shall be maintained by all parties involved at all times  
528 throughout the clinical trial. All data should be secured against unauthorized access. Study patients will be  
529 assigned a unique coded identifier on eCRFs. Patient data will be protected by the use of locked cabinets at  
530 the Clinical Centers and use of passwords, data encryption and secure, limited access storage of electronic  
531 data. The DCC has programs, policies and procedures in use at all times to ensure the security and  
532 confidentiality of the data. The explicit issue of privacy and confidentiality is outlined in the Informed  
533 Consent Form.

534  
535 **10 Study Organization**

536  
537 **10.1 Steering Committee and DSMB**  
538 The executive steering committee, committee comprised of the chairperson and the principal investigators of  
539 the main participating centers, approved the study design, protocol, and amendments issued to the Data and  
540 Safety Monitoring Board (DSMB) and the participating centers. An independent DSMB will review the  
541 safety data from the study and construct recommendations for adverse events/serious adverse events,  
542 protocol deviation, and follow-up case reports. Scheduled DSMB meetings will discuss safety or compliance  
543 issues and will provide advice on modifying or stopping the study as needed. However, the final decisions  
544 regarding changes in the study protocol remain in the hands of the executive steering committee. In addition,  
545 the DSMB will help to conduct the trial appropriately by reviewing and reporting the cumulative  
546 investigational data for accuracy and completeness, ensuring protocol compliance. The DSMB will develop  
547 a consensus understanding of all trial endpoints and definitions used in the event adjudication process.

548  
549  
550 **10.2 Clinical Event Adjudication Committee**  
551 The Clinical Events Committee (CEAC) is comprised of interventional and non-interventional  
552 cardiologists who are not participants in the study. The CEAC is charged with the development of specific  
553 criteria used for the categorization of clinical events and clinical endpoints in the study which are based on  
554 protocol. At the onset of the trial, the CEAC will establish explicit rules outlining the minimum amount of  
555 data required, and the algorithm followed in order to classify a clinical event. All members of the CEAC  
556 will be blinded to the primary results of the trial.

557 The CEAC will meet regularly to review and adjudicate all clinical events. The Committee will also  
558 review and rule on all deaths that occur throughout the trial.

559  
560 **10.5 Data Coordination and Site Management**  
561 Data coordination and site management services will be performed at the Cardiovascular Center and  
562 Clinical Research Center of Samsung Medical Center.

563  
564  
565 **11 Statistical Analysis**

566  
567 **11.1 Statistical Overview**  
568  
569 This trial is a prospective, open label, two-arm, randomized multi-center trial to test the  
570 noninferiority of P2Y12 antagonist monotherapy compared with aspirin plus P2Y12 antagonist following 3-  
571 month of DAPT after DES implantation.

572  
573  
574  
575  
576  
577  
578  
579  
580  
581  
582  
583  
584  
585  
586  
587  
588  
589  
590  
591  
592  
593  
594  
595  
596  
597  
598  
599  
600  
601  
602  
603  
604  
605  
606  
607  
608  
609  
610  
611  
612  
613  
614  
615  
616  
617  
618  
619  
620  
621

## 11.2 Sample Size

Hypothesis: P2Y12 antagonist monotherapy is noninferior to aspirin plus P2Y12 antagonist therapy in reducing ischemic events and bleeding risk after 3-month DAPT.

The study is a noninferiority trial. For the primary endpoint, we assume the incremental rate of composite events at 12-month follow-up will be 4.0% in both groups based on the results from previous studies.<sup>6,7</sup> The non-inferiority margin of 1.8 percentage points is chosen.

Sampling ratio is 1:1 = P2Y12 antagonist monotherapy : aspirin plus P2Y12 antagonist therapy

With a total of 3,000 patients (1,500 per group), the power of the study will be at least 80% with a 1-sided type I error rate of 0.05 and a loss to follow-up rate of 2%.

## 11.3 Randomization

Randomization will be performed 1:1 between P2Y12 antagonist and aspirin plus P2Y12 antagonist stratified by stent type, acute coronary syndrome, and enrolling sites. A written informed consent will be obtained from all patients. After obtaining informed consent, patients will be screened for eligibility and, if qualified, will be randomly assigned to a treatment group using a web-based response system (<http://www.ecrf.kr/smartchoice>) by computer-generated block randomization, and was stratified by clinical presentation (stable ischemic heart disease or acute coronary syndrome), enrolling center, type of P2Y12 receptor antagonist (clopidogrel, prasugrel, or ticagrelor), and type of stents used.

## 11.4 Analysis

### General

Continuous variables will be presented as mean  $\pm$  SD and compared with the Student t test. Categorical variables will be presented as counts and percentages and compared with the  $\chi^2$  or Fisher exact test as appropriate. End points will be analyzed with the use of time-to-event methods. Cumulative event rates will be estimated with the Kaplan–Meier method and compared using log-rank tests. Hazard ratios with 95% confidence interval (CI) will be estimated by the Cox proportional-hazards method. Landmark analysis at 3 months from the index procedure will be separately performed as major secondary analysis. Patients who are lost to follow-up will be censored at the time of the last known contact.

### Analysis Populations

All primary and secondary endpoints will be analyzed both on an intention-to-treat basis (all patients analyzed as part of their assigned treatment group) and on a per protocol basis (patients analyzed as part of their assigned treatment group only if they actually received their assigned treatment. For an intention-to-treat analysis, all patients who signed the written informed consent form and are randomized in the study will be included in the analysis sample, regardless of whether or not the correct treatment was administered, or whether crossover occurred. For the per protocol analysis, only enrolled patients who actually received the assigned treatment will be included in the analysis sample.

### Primary Endpoint Analysis

The primary endpoint will be analyzed on an intention-to-treat and per protocol basis. The null hypothesis will be evaluated on the intention-to-treat population using an inferiority statistic. If the upper limit of the 1-sided 95% CI of the difference is less than that of the prespecified non-inferiority margin, P2Y12 inhibitor monotherapy will be considered to be noninferior to conventional 12-month duration of DAPT.

622 **Subgroup Analyses**

623 1. Major subgroup analyses of the primary and major secondary endpoints will be performed:

624 (1) ACS

625 (2) Diabetes mellitus

626 (3) Implanted stent type

627 (4) Type of P2Y12 inhibitor (clopidogrel, prasugrel, or ticagrelor)

628 (5) Chronic kidney disease, defined as estimated glomerular filtration rate  $<60$  ml/min/m<sup>2</sup>

629 (6) Multivessel PCI

630 → The consistency of treatment effects in prespecified subgroups will be assessed using Cox regression  
631 models with tests for interaction.

632

633 **Treatment of missing values**

634 The primary analysis of the study end points will not be covariate adjusted. No imputation methods will be  
635 used to infer missing values of baseline variables. For the study end points, we will censor patients lost to  
636 follow-up and regard them as not having the primary end point when estimating Kaplan–Meier event rates.

637

638 **12 Publication Policy**

639 Study derived data are the property of the participating investigators. However, individual investigators will  
640 not use study related data for any purpose other than study completion or for generating publication material  
641 as stated in the study site agreement without prior consent from the executive committee. The presentation  
642 and/or publication of results from a single study site cannot precede presentation and/or publication of  
643 the multi-center results.

644

645 **12.1 Data Analysis and Release of Results**

646 No results will be released publicly before completion of the final analysis regarding the primary  
647 endpoint of this study. The statistical analysis will be performed according to the pre-specified analysis plan  
648 as described in this protocol. Any decisions on release of results will be undertaken by the Executive  
649 Committee after the approval of the DSMB.

650

651 **12.2 Review Process**

652 The Executive Committee will review the primary outcome data according to the pre-specified  
653 statistical analysis plan, and then will (i) decide on the early dissemination of the information at national and  
654 international scientific meetings (ii) provide the data to the publications committee which will in turn (a)  
655 first prepare a formal presentation to the Steering Committee members and (b) after taking under account  
656 the input and comments of the Steering Committee will proceed with submitting the manuscript to the  
657 Executive Committee. No study results will be released to the scientific or lay community without the  
658 approval of the Executive Committee.

659

660 **12.3 Authorship: Primary Outcome Paper**

661 Authorship of the primary outcome paper will be credited collectively to the "Investigators".

662

663 **12.4 Other Study Papers, Abstracts and Presentations**

664 Manuscripts on Ancillary Studies or Subset Analyses should be approved by the Executive Committee.  
665 The investigators significantly contributing to the study, considering both the number of patients enrolled by  
666 the specific investigators and their contribution to the study design will have the priority in the authorships  
667 of the ancillary studies or subset analysis. The first priority of authorship on subset studies will be given to  
668 the PI or an investigator designated by the PI. The investigators with the priority of authorship should be one  
669 of members in the major institutions which will include more than 50 study patients. Each presentation of  
670 results on behalf of the investigators should have the approval of the Executive Committee.

671  
672  
673  
674  
675  
676  
677  
678  
679  
680  
681  
682  
683  
684  
685  
686  
687  
688  
689  
690  
691  
692  
693  
694  
695  
696  
697  
698  
699  
700  
701  
702  
703  
704  
705  
706  
707  
708  
709  
710  
711  
712  
713  
714  
715  
716  
717

**13 Quality Assurances, Quality Control and Clinical Monitoring**

The purposes are:

- To ensure accuracy of study data;
- To ensure that data collection at multiple sites meets pre-specified criteria to ensure standard implementation;
- To provide constructive feedback to site and core laboratory staff to improve and/or maintain high performance; and
- To document data quality for the study record.

This section addresses of issues with respect to Protocol Adherence, Data collection at the clinical centers, and interpreter variability at the core laboratories.

**13.1 Protocol Adherence**

There are three key components, each of which is pre-specified. The DATABASE will be programmed to monitor: eligibility criteria, correct treatment administration (absence of crossovers, unblinding etc.), and completion in a timely manner of all required data collection (no missed visits, missed studies or specimens). Eligibility criteria are also checked for all or a random sample of patients at every clinic site visit by auditing the patient’s record/worksheet.

It is the Investigator's responsibility to ensure that there are no deviations from the protocol except in cases of medical emergencies, when the deviation is necessary to protect the life or physical well being of the patient. The DCC will monitor these aspects of protocol adherence continually. In addition, clinic site personnel will have clearly specified timeframes for entry of all data and for resolution of any edit queries. All of these aspects of protocol can be monitored at the DCC via real-time reporting, in aggregate and by clinic site.

Any of the protocol violations listed below will be reviewed immediately by the DCC and communicated to the principal investigator, Dr. Hyeon-Cheol Gwon. All remedial actions will be jointly decided and, in general, implemented by the DCC. Any clinical site being considered for temporary or permanent termination of patient recruitment may be visited administratively by the monitoring group. The major protocol violations for this study consist of, but are not limited to, the following:

Protocol Violations:

- Eligibility not confirmed, or subject found to be ineligible;
- Informed consent not obtained (or not obtained in a timely manner); and
- Randomized therapy not implemented per protocol (crossover to other treatment, use of other stents with PCI, excessive delay following randomization, non-certified operator performing procedure).
- Failure to conduct protocol required clinical follow-ups and within time windows
- Failure to report serious adverse events according to protocol requirements

In the event of any deviation from the protocol, the Investigator will be notified of the site’s non-compliance. Corrective actions will be required if necessary. After any one violation, the DCC will work closely with the site PI to ensure further violations are avoided. Any clinic investigator, certified for the trial, who commits any two of the above violations will be immediately considered for suspension from participation in the trial and the clinic site PI will also be given notice that further violations by investigators at that site may result in site suspension (after an administrative site visit). If a site is suspended early in the trial, all patient recruitment and follow-up (except for vital status and safety) may be terminated. A site suspended later in the trial may still be required to complete follow-up on those subjects already

718 randomized, assuming that the site's adherence to the follow-up protocol is satisfactory or can be  
719 remediated. Poor performance at a site with respect to data entry and edit resolution will, in general, be  
720 remediated via conference calls and site visits initiated by the DCC.  
721

### 722 **13.2 Data Collection: Electronic Case Report Forms (eCRF)**

723 DCC personnel will determine form content, considering (1) Identify the minimal set of measurements  
724 for the specified variables; (2) Choose those measurements (if more than one candidate) which are  
725 documentably valid and reliable and, other considerations being equal, are least burdensome to the subject;  
726 and (3) Develop, test and assess reliability of new measures as required. Experienced DCC staff will then  
727 order and format items to ensure clarity, smooth flow and to minimize missing information, using clear skip  
728 patterns, consistent coding for all close-ended items, and standard "footers" to identify form name, version  
729 date, and page number. Standard, modular data forms will be identified and developed to be used in both the  
730 Trial and Registry as needed.

731 Case report forms will be developed by the CRC as an online electronic form where investigators from  
732 individual site can access and input the data via the internet.  
733

### 734 **13.3 Training/Certification and Retraining**

735 The DCC will be responsible for providing training to the investigator and appropriate clinical site  
736 personnel. It is recommended that investigators review the IFU. Designated monitors will be trained  
737 appropriately to monitor study progress including but not limited to the protocol and eCRFs. The DCC will  
738 support trainings over a 1 month period, to ensure standard protocol implementation, data collection and  
739 management across sites. These training sessions will be carried out on-site or at the conference meeting.  
740 Clinical staff training components include (1) The Trial and Registry Protocols; (2) DATABASE  
741 SYSTEMS and eCRF for local web-based data entry; 3) medical record abstraction; 4) specimen/media  
742 collection and handling; 5) data handling; 6) interview techniques and 7) quality control expectations.  
743

### 744 **13.4 Site monitoring**

745  
746 The DCC will monitor the trial over its duration. A designated trial monitor, at appropriate intervals, will  
747 review investigational data for accuracy and completeness and to ensure compliance with the protocol. This  
748 trial monitor may inspect all documents and required records that are maintained by the Investigator/site,  
749 including medical records (office, clinic, or hospital) for the subjects in this trial. The Investigator/site will  
750 permit access to such records.  
751

## 752 **14 Core Labs**

### 753 **14.1. Angiographic Core Lab Measurements**

754 The central angiographic core laboratory (Samsung Medical Center, Seoul, South Korea) will have the  
755 following main functions: (1) to oversee major angiographic inclusion and exclusion criteria, and confirm  
756 the eligibility of the patient, (2) to quantify the disease burden and severity at baseline, before  
757 revascularization, (3) to assess the success of percutaneous interventional procedure for each lesion treated,  
758 (4) to independently review all revascularization procedures during the follow-up phase and determine  
759 whether revascularizations are due to treatment failure or are due to progression of disease at remote sites,  
760 which will then be adjudicated by the Clinical Events Adjudication Committee (CEAC). (5) To perform  
761 qualitative and quantitative analysis of all baseline and follow-up films. All baseline angiograms of patients  
762 entered in the trial will be reviewed. A comprehensive analysis of all major epicardial coronary arteries and  
763 side branches (>2.0mm) will be assessed quantitatively to define the extent of coronary disease severity (%  
764 diameter stenosis) for each coronary segment. The percent diameter stenosis will be assessed for each  
765 coronary segment and will be identified by the Coronary Artery Surgery Study (CASS) lesion number. In  
766

767 addition, patients randomized to percutaneous intervention will undergo a sequential qualitative and  
768 quantitative analysis using computerized quantitative angiographic software (CASS, PIE MEDICAL, The  
769 Netherlands) to determine lesion specific procedure success. Any angiogram performed during the follow-  
770 up phase of the trial will be sent to the angiographic core laboratory. Revascularization procedures will be  
771 adjudicated as resulting from a target revascularization or disease progression if revascularization results  
772 from a new obstruction at a remote site. This information will be provided to CEAC for final adjudication.  
773 All data will be collected on individual case report forms identified by clinical site, patient identification and  
774 procedure date. Appendix B contains more details on the Angiographic Core Laboratory.  
775

## 776 15. Adverse Events/Serious Adverse Events/Unexpected Adverse Device Effects

### 777 Definitions

#### 778 15.1 Adverse Event

779 For the purpose of this trial, an adverse event (AE) is defined as any untoward medical occurrence  
780 in a patient or clinical investigation subject enrolled in a device clinical study and which does not  
781 necessarily have to have a causal relationship with this treatment. An adverse event can therefore be any  
782 unfavorable and unintended sign (including an abnormal laboratory finding, for example), symptom or  
783 disease temporally associated with the study procedures, whether or not considered related to the  
784 investigational device or procedure.  
785

#### 786 15.2 Serious Adverse Event

787 An adverse event is considered serious for this trial if it meets one or more of the following criteria and is  
788 device-related:  
789

- 790 • Results in death
- 791 • Is life-threatening, *i.e.*, the patient was, in the opinion of the Investigator, at immediate risk of  
792 death from the event as it occurred (*It does not include an event that, had it occurred in a more*  
793 *severe form, might have caused death.*)
- 794 • Results in persistent or significant disability or incapacity (significant, persistent or permanent  
795 change or disruption in patient's body function/structure, physical activity or quality of life
- 796 • Requires in-patient hospitalization or prolongs hospitalization
- 797 • Results in a congenital anomaly/birth defect or,
- 798 • An important medical event that may not result in death, be life-threatening, or require  
799 hospitalization but may be considered serious when, based upon appropriate medical judgment,  
800 may jeopardize the patient and/or may require intervention to prevent one of the outcomes listed  
801 in this definition and/or necessitates immediate medical or surgical intervention to prevent  
802 permanent impairment of a body function/structure or to relieve unanticipated temporary  
803 impairment or damage. Examples of such medical events include allergic bronchospasm  
804 requiring intensive treatment in an emergency room or at home, blood dyscrasias or convulsions  
805 that do not result in inpatient hospitalization, or the development of drug dependency or drug  
806 abuse.  
807

808 A distinction is to be drawn between serious and severe adverse events. A severe adverse event may not be  
809 serious and a serious adverse event need not be considered severe. The term "severe" is used to describe the  
810 intensity of a specific event (as in mild, moderate, severe). However, the event itself may be of minor  
811 medical significance (e.g., severe headache). This is not the same as "serious", which is based on  
812

814 patient/event outcome or action criteria usually associated with events that pose a threat to a patient's life or  
815 functioning.

816 *Note: All events included in the endpoint events are considered SAEs (the cause for an unscheduled*  
817 *revascularization will represent the SAE).*

818

### 819 **15.3 Unanticipated Adverse Device Effect**

820 An Unanticipated Adverse Device Effect (UADE) is defined as any serious adverse effect on health or  
821 safety or any life-threatening problem or death caused by, or associated with, a device, if that effect,  
822 problem or death was:

- 823 • Not previously identified in nature, severity, or degree of incidence in the investigational plan or  
824 application (including a supplementary plan or application), or
- 825 • Any other unanticipated serious problem associated with a device that relates to the rights,  
826 safety, or welfare of subjects.

827 *Note: The term "effect" implies causal relationship with the device*

828

## 829 **16 Event Adjudication and Reporting**

830

### 831 **16.1 Investigator Responsibilities:**

832

#### 833 **16.1.1 Adverse Events**

834 The investigator will assess all adverse events for the severity, seriousness, and the causal  
835 relationship to study device and procedures. All non-serious adverse events are to be reported in detail and  
836 in a timely manner to DCC, on appropriate Case Report Form pages, whether or not they are believed to be  
837 serious or related to the investigational device.

838

839

#### 840 **16.1.2 Serious Adverse Events (SAE)/Unanticipated Adverse Device Effects**

841 All events meeting the SAE/UADE criteria must be reported to the DCC within 24 hours of  
842 becoming aware of the events, which will be notified promptly to the DSMB and CEAC. To be noted that  
843 all endpoint events fall into this category, and must be reported within the above timeframe.

844 The Investigator must complete the Case Report Form for each serious adverse event, whether  
845 related or not to study device or procedure. The information provided must be sufficient to allow for  
846 independent medical assessment of the event. The Safety Officer will contact the Investigator should it be  
847 necessary to clarify any information. The Investigator should provide any additional follow-up information  
848 regarding the event to DCC as soon as it becomes available. All adverse events should be followed until  
849 resolution or stabilization

850 The site IRB/EC must be notified by the Investigators within the timeframe specified by their local  
851 standard operating procedures (SOPs) and the applicable regulations. Complications associated with PCI,  
852 such as abrupt closure, dissection, no reflow, thrombosis, dissection, embolism, stroke, perforation and/or  
853 extravascular staining, will be recorded on the Case Report Form as such, and will be recorded specifically  
854 as an adverse event/SAE.

855 Planned hospital admissions and/or planned surgical operations for an illness or disease which  
856 existed before the device was deployed or the patient was randomized in a clinical study are not to be  
857 considered adverse events. However, baseline conditions which deteriorate during a clinical study may be  
858 considered adverse events.

859 It should be noted here that all clinical endpoints, including MI/Stroke, unscheduled  
860 revascularization and death will require central adjudication and are included here, even though they  
861 contribute to trial outcomes. The study investigators will be responsible to provide all applicable and

862 available source documentation to the Data Coordinating Center (DCC) in order to allow an independent  
863 assessment of these events by the CEAC members.

864 Periodically, the database will be queried for cardiac enzyme triggers/ECG triggers or QCA triggers.  
865 Copies of original lab reports all required source documentation for these triggers must be submitted by the  
866 investigators to the CEAC for adjudication.

867  
868  
869

## 870 **16. 2 Designee’s responsibilities**

871

### 872 **16.2.1. Reporting responsibilities**

873 All UADEs will be reported to the all participating Investigators and all reviewing IRBs/ECs within  
874 10 working days of being notified by the event. All non-serious and serious adverse events (not UADEs)  
875 will also be provided to CEAC.

876

### 877 **16. 2. 2. Endpoint and SAE/UADE Adjudication.**

878 With the exception of all-cause mortality, most endpoints will require clear, prespecified criteria, and  
879 centralized review. These endpoints will be captured during patient interview, supplemented by death  
880 certificates; hospital record abstracts and related reports (autopsy, biopsy, diagnostic output). These  
881 endpoints will be adjudicated using the same procedure as SAEs and UADEs.

882 From extensive experience, the following approach is proposed. First, all required documents, reports,  
883 hospital records will be identified, made anonymous, and copied to the DCC by clinical staff. Second, the  
884 DCC will check to ensure confidentiality and, if required, have the records centrally abstracted onto standard  
885 forms by trained DCC staff. Central abstraction in large (>30) batches is recommended to reduce variability  
886 and secular drift and maintain adequate accuracy and completeness. Third, centrally prepared forms and  
887 documents will be circulated to CEAC members for assessment.

888

### 889 **16.2.3 Device Failures and Malfunctions**

890 Device malfunctions, device-related adverse events and product nonconformities will be reported to the  
891 appropriate manufacturers following the local product complaint procedures by all participating site(s).  
892 Complaints will also be reported to regulatory authorities as per local requirements.

893

## 894 **17 Regulatory Responsibilities**

895

### 896 **17.1 Investigator Responsibilities**

897 The investigator is responsible for ensuring that the trial is conducted according to all signed  
898 agreements, the study protocol and good clinical practice (GCP) requirements. Also, each investigator  
899 must complete and sign the Investigator's Agreement. In signing, the investigator agrees to:

900

- 901 • Sign and adhere to the Investigator Agreement
- 902 • Participate in Investigator meetings and training sessions as scheduled by Sponsor
- 903 • Maintain up-to-date angiographic and IVUS equipment (if applicable)
- 904 • Be willing to provide original cine films/CD ROMs/IVUS videotape for analysis
- 905 • Have access to cardiac surgery
- 906 • Be willing to perform and be capable of performing treatment procedures as outlined in this protocol
- 907 • Comply with all required elements of this protocol (e.g., perform testing and follow-up as specified,  
908 especially during personnel transitions) and supply angiographic material suitable for quantitative  
909 analysis



- 910 • Obtain written Informed Consent from each study participant before any study specific procedures
- 911 are performed in accordance with GCP
- 912 • Complete all electronic case report forms for completed patients visits and or applicable events (i.e.,
- 913 TVF, SAE/UADE, TVR) prior to scheduled monitoring visits
- 914 • Be willing to change hospital routine if required by protocol (as long as patient safety and well-
- 915 being is not compromised)
- 916 • Adhere to all relevant Core Laboratory requirements and,
- 917

## 918 **17.2 Institutional Review Board (IRB) or Ethics Committee (EC) Approval**

919 The investigator must submit the study protocol to his IRB or EC and obtain their written approval  
920 before being allowed to conduct and participate in the study. The investigator is also responsible for  
921 fulfilling any conditions of approval imposed by the IRB, such as regular reporting, study timing, etc. The  
922 investigator will provide the Sponsor with copies of such approvals and reports.

## 923 **17.3 Informed Consent**

924 Part of the IRB/EC approval must include approval of an Informed Consent text specific to the  
925 study. The investigator must administer this approved Informed Consent text to each prospective study  
926 patient and obtain the patient's signature on the text prior to enrollment in the study. This may be modified  
927 to suit the requirements of the individual site. The investigator will provide the Sponsor with a copy of the  
928 approved Informed Consent for his/her site.

## 929 **17.4 Study Coordinator**

930 To assure proper execution of the study protocol, each investigator must identify at least one study  
931 coordinator for the site. Working with and under the authority of the investigator, the study coordinator  
932 assures that all study requirements are fulfilled and is the contact person at the site for all aspects of study  
933 administration.

## 934 **18 Protocol Deviations and Amendments**

### 935 **18.1 Protocol Deviations**

936 This study will be conducted as described in this protocol, except for an emergency situation in  
937 which the protection, safety, and well-being of the patient require immediate intervention, based on the  
938 judgment of the investigator (or a responsible, appropriately trained professional designated by the  
939 investigator). In the event of a significant deviation from the protocol due to an emergency, accident, or  
940 mistake, the investigator or designee must contact the executive committee at the earliest possible time by  
941 telephone. This will allow an early joint decision regarding the patient's continuation in the study. The  
942 investigator will document this decision. The IRB or EC will be informed of all protocol changes by the  
943 investigator in accordance with the IRB or EC established procedure. No deviations from the protocol of any  
944 type will be made without complying with all the IRB or EC established procedures.

945 It is intended that all statistical analyses specified in this protocol will be performed. However, it  
946 is conceivable that due to the study observations, some scheduled analyses may not be performed. In  
947 addition, study observations or analysis results may suggest the need for additional statistical analyses of the  
948 collected study data. In either case, deviations (subtractions or additions) from the planned statistical  
949 analysis will be fully described in the final clinical study report. Furthermore, any additional analyses  
950 performed beyond those specified in this protocol will be descriptive in nature and will not include  
951 hypothesis testing for the purposes of inferential conclusions.

### 952 **18.2 Protocol Amendments**

958 In case any revisions to the protocol are required, protocol amendments will be provided to investigators by  
 959 the executive committee prior to implementation. The Primary Investigator(s) will be responsible for  
 960 notifying the IRB of the protocol amendment with administrative changes or obtaining IRB approval of the  
 961 protocol amendment with changes in patient care or safety. Institutional Review Board  
 962 acknowledgements/approvals must be documented in writing prior to implementing protocol amendments.  
 963  
 964

**19 Records Retention and Reports**

966 To comply with ICH guidelines, the Primary Investigator will maintain all records relevant to  
 967 this study for 2 years following study completion, unless the records are archived by an external vendor.  
 968 The investigator shall take responsibility for maintaining adequate and accurate hard copy source documents  
 969 of all observations and data generated as required during this study. Such documentation may be subject to  
 970 inspection by appropriate regulatory agencies.

**19.1 Records**

972 Each investigator must maintain the following accurate, complete, and current records relating to the  
 973 conduct of the investigation. (The data for some of these records may be available in computerized form  
 974 from the Data Coordinating Center; however the final responsibility for maintaining remains with the  
 975 investigator.)  
 976

- 977 • All correspondence with another investigator, an IRB, a Core Laboratory, the Sponsor, a  
 978 monitor, Data Coordinating Center, including required reports.
- 979 • Records of receipt, use, or disposition of the study device, including receipt dates, serial and lot  
 980 numbers, names of all persons who received or used the device, why and how many devices  
 981 were disposed.
- 982 • Records of each subject's case history, including study-required Case Report Forms, evidence of  
 983 informed consent, all relevant observations of adverse device or drug effects, the condition of  
 984 each subject upon entering and during the course of the investigation, relevant medical history,  
 985 the results of all diagnostic testing, and the date of each study treatment.

**19.2 Reports**

987 Below is a list of the reports which are the investigator's responsibility to generate. The table also  
 988 shows to whom the report is to be sent and with what frequency or within what time constraints. While some  
 989 of these reports will be developed by or with the assistance of the Data Coordinating Center, the final  
 990 responsibility for them rests with the investigator.  
 991

**Reports Required from Clinical Investigators:**

| Type of Report                       | Prepared by Investigator For: | Time Constraints of Notification |
|--------------------------------------|-------------------------------|----------------------------------|
| Serious adverse event                | IRB/EC                        | Per local regulations.           |
|                                      | DCC                           | Within 24 hours                  |
| Patient withdrawal                   | DCC                           | Notify within 7 days.            |
| Annual progress report               | EC<br>DCC                     | Submitted per 6 months.          |
| Deviations from investigational plan | IRB/EC                        | Per local standard.              |
|                                      | DCC                           | Notify within 7 days.            |
| Informed consent not obtained        | DCC<br>IRB                    | Notify within 7 days.            |

|                      |     |                 |
|----------------------|-----|-----------------|
| Final summary report | DCC | Within 1 month. |
|----------------------|-----|-----------------|

993  
994  
995  
996  
997  
998  
999  
1000  
1001  
1002  
1003  
1004  
1005  
1006  
1007  
1008  
1009  
1010  
1011  
1012  
1013  
1014  
1015  
1016  
1017  
1018  
1019  
1020  
1021  
1022  
1023  
1024  
1025  
1026

**20. Investigational Agreement**

I have read and understand the protocol (including the Investigator's Brochure) and agree that it contains all the ethical, legal and scientific information necessary to conduct this trial. I will personally conduct the study as described and agree to adhere strictly to the attached protocol.

I will provide copies of the protocol to all physicians, nurses and other professional personnel, who under my responsibility will participate in this study. I will discuss the protocol with them to assure that they are sufficiently informed regarding the devices used in the study, the concurrent medications, the efficacy and safety parameters, and the overall execution of the study in general. I am aware that this protocol must be approved by the Institutional Review Board (IRB) or Ethics Committee (EC) responsible for such matters in the clinical study facility where the device and drug will be tested, prior to commencement of this study. I agree that clinical data entered on case report forms by the staff and I, can be utilized in various ways including, but not limited to, publication in peer journals, submission as abstracts, submission to governmental regulatory authorities and/or in combination with clinical data gathered from other research sites, whenever applicable. I agree to allow monitors and auditors as well as inspectors from regulatory authorities, full access to all medical records at the research facility for patients screened or randomized in the study.

I agree to provide all patients with informed consent forms, as required by government and ICH regulations. I further agree to report to the DCC any adverse experiences in accordance with the terms of this protocol, KFDA regulation, and ICH guideline.

\_\_\_\_\_  
Principal Investigator (print)

\_\_\_\_\_  
Principal Investigator (signature)

\_\_\_\_\_  
Date

\_\_\_\_\_  
Institution Name/Location

1027

1028 **Appendix A. Definitions**

1029  
1030 **ACC/AHA Classification Scheme of Coronary Lesions: Lesion-Specific Characteristics**

1031 **Type A Lesions** (High Success, >85%; Low Risk)

- 1032 . Discrete (< 10 mm length)
- 1033 . Little or no calcification
- 1034 . Concentric
- 1035 . Less than totally occlusive
- 1036 . Readily accessible
- 1037 . Not ostial in location
- 1038 . Nonangulated segment, < 45°
- 1039 . No major branch involvement
- 1040 . Smooth contour
- 1041 . Absence of thrombus

1042  
1043 **Type B Lesions\*** (Moderate Success, 60-85%; Moderate risk)

- 1044 . Tubular (10-20 mm length)
- 1045 . Moderate-to-heavy calcification
- 1046 . Eccentric
- 1047 . Total occlusions < 3 mo old
- 1048 . Moderate tortuosity of proximal segment
- 1049 . Ostial in location
- 1050 . Moderately angulated segment, > 45°, < 90°
- 1051 . Bifurcation lesions requiring double guide wires
- 1052 . Irregular contour
- 1053 . Some thrombus present

1054 \* Type B1 lesions: One adverse characteristic

1055 \* Type B2 lesions: ≥ two adverse characteristics

1056  
1057 **Type C Lesions** (Low Success, <60%; High Risk)

- 1058 . Diffuse (> 2 cm length)
- 1059 . Total occlusions > 3 mo old
- 1060 . Excessive tortuosity of proximal segment
- 1061 . Inability to protect major side branches
- 1062 . Extremely angulated segments > 90°
- 1063 . Degenerated vein grafts with friable lesions

1064  
1065 **Acute closure (abrupt closure)**

1066 Occurrence of new severely reduced flow Thrombosis In Myocardial Infarction (TIMI) grade 0 or 1 within the target  
1067 vessel during the index procedure that persists and requires rescue by a non-assigned treatment strategy (including  
1068 emergency surgery), or results in myocardial infarction or death. Abrupt closure requires proven association with a  
1069 mechanical dissection of the treatment lesion or instrumented vessel, coronary thrombus, or severe spasm. Abrupt  
1070 closure does not connote "no reflow" (due to microvascular flow limitation), in which the vessel is patent but had  
1071 reduced flow. Abrupt closure also does not connote transient closure with reduced flow in which the index treatment  
1072 application reversed the closure.

1073 **Subabrupt Closure:** abrupt closure that occurs after the index procedure is completed (and the patient left the  
1074 catheterization laboratory) and before the 30-day follow-up endpoint.

1075 **Threatened Abrupt Closure:** Grade B dissection and ≥ 50% diameter stenosis or any dissection of grade C or higher.

1076  
1077 **Acute coronary syndrome**

1078 \* ST-segment elevation MI (STEMI)

1079 : elevation of ST-segment more than 0.1 mV in 2 or more contiguous ECG leads or new left bundle-branch block with  
1080 elevated biomarkers of myocardial necrosis

1081  
1082 \* Non-ST-segment elevation MI (NSTEMI)

1083 : Elevated biomarkers of myocardial necrosis (troponin or CK-MB > X1 URL) with one of the following  
1084 (a) Transient ST-segment elevation or depression, or T-wave changes consistent with myocardial ischemia  
1085 (b) Identification of a culprit lesion at coronary angiography

1086  
1087 \* Unstable angina  
1088 An accelerating pattern or recurrent episodes of chest pain at rest or with minimal effort AND new ST-segment  
1089 depression of at least 0.05 mV, or T wave inversion of at least 0.3 mV in at least 2 leads  
1090

### 1091 **Anticipated Adverse Event**

1092 Any undesirable experience (sign, symptom, illness, abnormal laboratory value, or other medical event) occurring to a  
1093 patient, whether or not considered related to the investigational product(s) or drug regimen prescribed as part of the  
1094 protocol, predefined in the protocol and/or IFU, that is identified or worsens or occurs in frequency that is not  
1095 considered normal during a clinical trial. See also: Adverse Event (AE), Serious Adverse Event (SAE), Unanticipated  
1096 Adverse Device Effect (UADE)  
1097

### 1098 **Adverse Device Effect**

1099 Any untoward and unintended response to a medical device. This definition includes any event resulting from  
1100 insufficiencies or inadequacies in the Instructions for Use or the deployment of the device. It also includes any event  
1101 that is a result of a user error.  
1102

### 1103 **Adverse Event (AE)**

1104 An AE is any untoward medical occurrence in a patient or clinical investigation when the patient was administered a  
1105 study product and which does not necessarily have a causal relationship with this treatment. An AE can therefore be  
1106 any unfavorable and unintended sign (including an abnormal laboratory finding), symptom, or disease temporally  
1107 associated with the use of a medicinal (investigational) product whether or not related to the study product. See also:  
1108 Anticipated Adverse Event, Serious Adverse Event (SAE), Unanticipated Adverse Device Effect (UADE)  
1109

### 1110 **Aneurysm**

1111 An abnormal expansion or protrusion of a coronary blood vessel resulting from a disease or weakening of the vessel  
1112 wall (all 3 layers) that exceeds the reference vessel diameter by 1.5 times  
1113

### 1114 **Angina**

1115 Canadian Cardiovascular Society Classification of Stable Angina

1116 I. Ordinary physical activity does not cause angina, such as walking or climbing stairs. Angina occurs with strenuous,  
1117 rapid or prolonged exertion at work or recreation.

1118 II. Slight. Slight limitation of ordinary activity. Angina occurs on walking or climbing stairs rapidly, walking uphill,  
1119 walking or stair climbing after meals, or in cold, in wind, under emotional stress or only during the few hours after  
1120 awakening. Angina occurs on walking more than two blocks on the level and climbing more than one flight of ordinary  
1121 stairs at a normal pace and in normal condition.

1122 III. Marked. Marked limitation of ordinary physical activity. Angina occurs on walking one to two blocks on the level  
1123 and climbing one flight of stairs in normal conditions and at a normal pace.

1124 IV. Inability. Inability to carry on any physical activity without discomfort . angina symptoms may be present at rest.  
1125

1126 Braunwald Classification of Unstable Angina

1127 I. New onset of severe or accelerated angina: Patients with new onset (< 2 months in duration) exertional angina  
1128 pectoris that is severe or frequent (> 3 episodes/day) or patients with chronic stable angina who develop accelerated  
1129 angina (that is, angina distinctly more frequent, severe, longer in duration, or precipitated by distinctly less exertion  
1130 than previously) but who have not experienced pain at rest during the preceding 2 months.

1131 II. Angina at rest, subacute: Patients with 1 or more episodes of angina at rest during the preceding month but not  
1132 within the preceding 48 hours.

1133 III. Angina at rest, acute: Patients with 1 or more episodes of angina at rest within the preceding 48 hours.  
1134

### 1135 **Bifurcation Lesion**

1141 A lesion located at both the main vessel and a side branch of that main vessel.

Indicate if the lesion is at a bifurcation/trifurcation. A bifurcation/trifurcation is a division of a vessel into at least two branches, each of which is >2 mm or greater in diameter. [Medina classification]

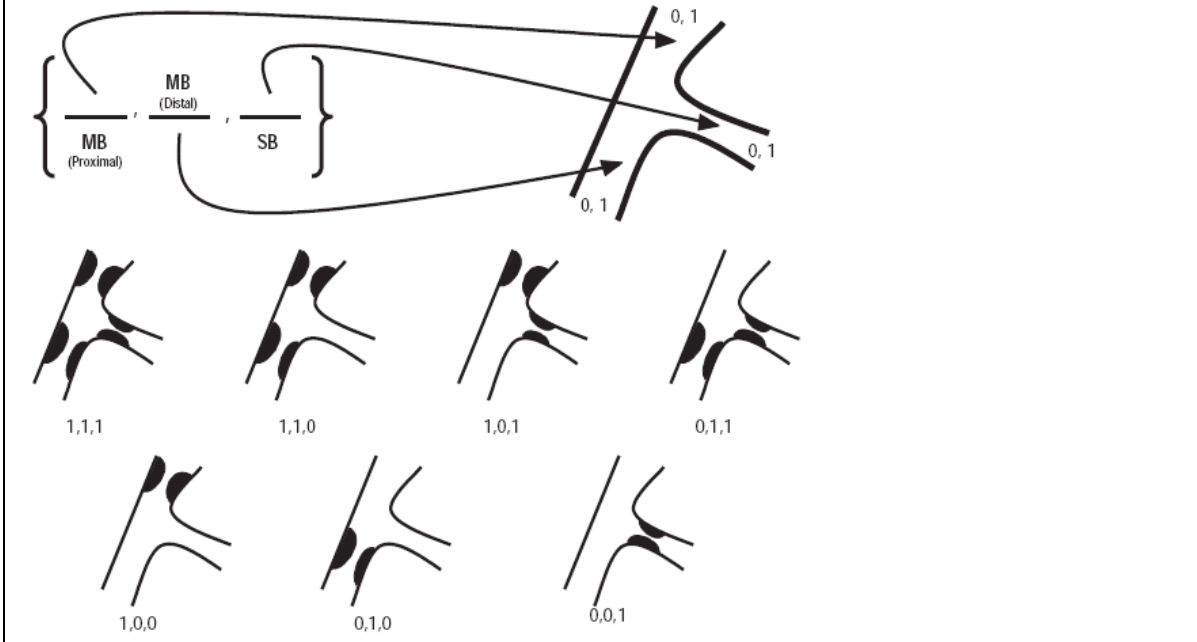

1142  
1143

1144 **Bleeding/Hemorrhagic Complications**

1145 An episode of bleeding is defined by the BARC<sup>22</sup> criteria as:

**Table 3. Bleeding Academic Research Consortium Definition for Bleeding**

Type 0: no bleeding

Type 1: bleeding that is not actionable and does not cause the patient to seek unscheduled performance of studies, hospitalization, or treatment by a healthcare professional; may include episodes leading to self-discontinuation of medical therapy by the patient without consulting a healthcare professional

Type 2: any overt, actionable sign of hemorrhage (eg, more bleeding than would be expected for a clinical circumstance, including bleeding found by imaging alone) that does not fit the criteria for type 3, 4, or 5 but does meet at least one of the following criteria: (1) requiring nonsurgical, medical intervention by a healthcare professional, (2) leading to hospitalization or increased level of care, or (3) prompting evaluation

Type 3

Type 3a

Overt bleeding plus hemoglobin drop of 3 to <5 g/dL\* (provided hemoglobin drop is related to bleed)

Any transfusion with overt bleeding

Type 3b

Overt bleeding plus hemoglobin drop  $\geq 5$  g/dL\* (provided hemoglobin drop is related to bleed)

Cardiac tamponade

Bleeding requiring surgical intervention for control (excluding dental/nasal/skin/hemorrhoid)

Bleeding requiring intravenous vasoactive agents

Type 3c

Intracranial hemorrhage (does not include microbleeds or hemorrhagic transformation, does include intraspinal)

Subcategories confirmed by autopsy or imaging or lumbar puncture

Intraocular bleed compromising vision

Type 4: CABG-related bleeding

Perioperative intracranial bleeding within 48 h

Reoperation after closure of sternotomy for the purpose of controlling bleeding

Transfusion of  $\geq 5$  U whole blood or packed red blood cells within a 48-h period†

Chest tube output  $\geq 2$ L within a 24-h period

Type 5: fatal bleeding

Type 5a

Probable fatal bleeding; no autopsy or imaging confirmation but clinically suspicious

Type 5b

Definite fatal bleeding; overt bleeding or autopsy or imaging confirmation

CABG indicates coronary artery bypass graft. Platelet transfusions should be recorded and reported but are not included in these definitions until further information is obtained about the relationship to outcomes. If a CABG-related bleed is not adjudicated as at least a type 3 severity event, it will be classified as not a bleeding event. If a bleeding event occurs with a clear temporal relationship to CABG (ie, within a 48-h time frame) but does not meet type 4 severity criteria, it will be classified as not a bleeding event.

\*Corrected for transfusion (1 U packed red blood cells or 1 U whole blood = 1 g/dL hemoglobin).

†Cell saver products are not counted.

1146

1147

1148 **Chronic Concomitant Medication**

1149 Chronic concomitant medication refers to the following:

1150 a) medication that has been prescribed or is over the counter, that has been taken or will continue to be taken regularly  
1151 for at least a period of 6 months; or

1152 b) medication that is required to be taken indefinitely by the patient; or

1153 c) medication that has been prescribed or taken multiple times (each time for at least 6 months).

1154

1155 **Chronic Occlusion**

1156 Chronic total occlusion: Total occlusion (TIMI 0 and 1) with either: (1) known duration  $\geq 3$  mo, or (2) bridging  
1157 collaterals

1158

1159 **Clinical Device Failure**

1160 A device is said to have failed if it did not meet the requirements of the definition for clinical device success. See also:  
1161 Clinical Device Success and Clinical Procedure Success

1162

1163 **Clinical Device Success**

1164 Achievement of a final in-stent residual diameter stenosis of < 20% assessed by online quantitative angiography or  
1165 visual estimation, without device failure or malfunction. A device is considered to have failed if it did not meet the  
1166 requirements of the definition for clinical device success. See also: Clinical Procedure Success and Device Failure and  
1167 malfunction.

1168

1169

1170 **Clinical Procedure Success**

1171 Achievement of a final in-stent diameter stenosis of < 20% by online QCA or visual estimation with or without any  
1172 adjunctive devices, and without the occurrence of cardiac death, target vessel MI (Q-wave and non Q-wave MI), or  
1173 repeat revascularization of the target lesion during the health care facility stay. See also: Clinical Device Success  
1174  
1175

### 1176 **Composite Endpoint**

1177 Composite endpoint is defined by the Academic Research Consortium as follows:

1178 Device-oriented composite includes cardiac death, myocardial infarction attributed to the target vessel, and target  
1179 lesion revascularization

1180 Patient-oriented composite includes all-cause mortality, any myocardial infarction, and any repeat revascularization  
1181 (includes all target and non-target vessel)  
1182  
1183

### 1184 **Coronary Artery Bypass Graft (CABG) Surgery**

1185 Acute CABG surgery is defined as immediate transfer from the catheterization laboratory to the operative room for  
1186 emergent bypass surgery during the initial treatment phase. Coronary artery bypass graft surgery during follow-up is  
1187 only considered as a target vessel revascularization and major adverse coronary event if coronary angiography indicates  
1188 a diameter of stenosis >50% of the stented coronary segment associated with one of the following conditions:

- 1189 A positive history of recurrent angina pectoris presumably related to the target vessel
- 1190 Objective signs of ischemia (exercise test or equivalent) presumably related to the target vessel
- 1191 Abnormal results of any invasive functional diagnostic test (eg, Doppler flow velocity reserve, fractional flow  
1192 reserve)  
1193

### 1194 **Cerebrovascular accident (CVA)**

1195 Sudden onset of vertigo, numbness, sphasia, dysarthria or central neurologic deficit secondary to vascular lesions of the  
1196 brain such as hemorrhage, embolism, thrombosis, or rupturing aneurysm, that persists for > 72 hours  
1197

1198 \* CVA type

- 1199 1. Hemorrhagic: A stroke with documentation on imaging (e.g., CT scan or MRI of hemorrhage in the cerebral  
1200 parenchyma, or a subdural or subarachnoid hemorrhage). Evidence of hemorrhagic stroke obtained from  
1201 lumbar puncture, neurosurgery, or autopsy can also confirm the diagnosis.
- 1202 2. Nonhemorrhagic: A focal neurological deficit that results from a thrombus or embolus (and not due to  
1203 hemorrhage) that appears and is still partially evident for more than 24 hours
- 1204 3. Unknown/no imaging performed: if the type of stroke could not be determined by imaging or other means  
1205 (from lumbar puncture, neurosurgery, or autopsy)  
1206

### 1207 **Death**

1208 Death defined by the Academic Research Consortium is as follows:

1209 All death is considered to be cardiac death unless an unequivocal noncardiac cause can be established. Specifically, any  
1210 unexpected death even in patients with coexisting potentially fatal noncardiac disease (eg, cancer, infection) should be  
1211 classified as cardiac. The cause of death (cardiac vs. non-cardiac) will be adjudicated by an independent clinical event  
1212 adjudication committee

1213 Cardiac death: Any death due to proximate cardiac cause (eg, myocardial infarction, low-output failure, fatal  
1214 arrhythmia), unwitnessed death and death of unknown cause, and all procedure-related deaths, including those related  
1215 to concomitant treatment, will be classified as cardiac death.

1216 Vascular death: Death caused by noncoronary vascular causes, such as cerebrovascular disease, pulmonary embolism,  
1217 ruptured aortic aneurysm, dissecting aneurysm, or other vascular diseases.

1218 Non-cardiovascular death: Any death not covered by the above definitions, such as death caused by infection,  
1219 malignancy, sepsis, pulmonary causes, accident, suicide, or trauma.  
1220

### 1221 **Device Failure**

1222 Defined when the following occur:

- 1223 1. Failure to cross lesion due to limitations in delivery system flexibility or profile
- 1224 2. Poor or otherwise inaccurately placed stent due to poor sheath movement (possible if angulation of



- 1225 anatomy is high), inadequate fluoro angle, poor dye flow/visibility due to device profile or guide size, or  
 1226 other equipment related limitation  
 1227 3. Inability to cross previously implanted stent (again for profile/flexibility reasons)  
 1228

**Device Malfunction**

- 1229 Failure of a device to meet its performance specifications or otherwise perform as intended. Performance specifications  
 1230 include all claims made in the labeling of the device. The intended performance of a device refers to the intended use  
 1231 for which the device is labeled or marketed.  
 1232  
 1233 1. Break/inoperable delivery mechanism (handle apparatus)  
 1234 2. Kink/break in delivery system shaft  
 1235 3. Stent not retained within sheath  
 1236 4. Stent moves after placement  
 1237 5. Stent lost at any point during procedure  
 1238

**Diabetes**

- 1239 Defined as  
 1240  
 1241 1. History of diabetes, regardless of duration of disease, need for antidiabetic agents, or  
 1242 2. a fasting blood glucose > 126 mg/dl.  
 1243 The type of diabetic control should be noted:  
 1244 ① None  
 1245 ② Diet: Diet treatment  
 1246 ③ Oral: Oral agent treatment  
 1247 ④ Insulin: Insulin treatment (includes any combination of insulin)  
 1248

**Dissection**

1249 Defined according to the National Heart, Lung, and Blood Institute (NHLBI) Dissection Classification System  
 1250

**E031 Dissection NHLBI classification**

| Dissection type | Description                                                                                                                                   | Angiographic Appearance                                                               |
|-----------------|-----------------------------------------------------------------------------------------------------------------------------------------------|---------------------------------------------------------------------------------------|
| A               | Minor radiolucencies within the coronary lumen during contrast injection with minimal or no persistence after dye clearance.                  |   |
| B               | Parallel tracts or double lumen separated by a radiolucent area during contrast injection with minimal or no persistence after dye clearance. |   |
| C               | Extraluminal cap with persistence of contrast after dye clearance from the coronary lumen.                                                    |   |
| D               | Spiral luminal filling defects.                                                                                                               |   |
| E +             | New persistent filling defects.                                                                                                               |  |
| F +             | Those non-A-E types that lead to impaired flow or total occlusion.                                                                            |  |

+ May represent thrombus

- Type A, B: minor dissection, type C-F: major dissection

1251  
 1252  
 1253

1254 **Enrolled Patient**

1255 The point of enrollment occurs when a patient or patient’s legally authorized representative has provided written  
1256 informed consent to participate in the trial  
1257

1258 **In-stent**

1259 Within the stent margins  
1260

1261 **In-segment**

1262 Within the stent margins and 5 mm proximal and 5 mm distal to the stent  
1263

1264 **Late Loss (LL)**

1265 Late loss is calculated as follows:

1266 
$$[\text{Minimum lumen diameter (MLD) post-procedure}] - [\text{MLD at follow-up}]$$

1268 In-segment Late Loss: 
$$[\text{in-segment MLD post-procedure}] - [\text{in segment MLD at follow-up}]$$

1269 In-stent Late Loss: 
$$[\text{in-stent MLD post-procedure}] - [\text{in-stent MLD at follow-up}]$$
  
1270

1271 **Minimum Lumen Diameter (MLD)**

1272 The average of 2 orthogonal views (when possible) of the narrowest point within the area of assessment in lesion, in  
1273 stent, or in segment.

1274 MLD is measured during QCA by the angiographic core laboratory  
1275

1276 **Myocardial Infarction (MI)**

1277 Myocardial Infarction Classification and Criteria for Diagnosis is defined by the Academic Research Consortium as  
1278 follows:

| Classification      | Biomarker Criteria*                                                                                              | Additional Criteria                                                                                                                                               |
|---------------------|------------------------------------------------------------------------------------------------------------------|-------------------------------------------------------------------------------------------------------------------------------------------------------------------|
| Periprocedural PCI  | Troponin > 3 x URL or CK-MB > 3 x URL                                                                            | Baseline value <URL                                                                                                                                               |
| Periprocedural CABG | Troponin > 5 x URL or CK-MB > 5 x URL                                                                            | Baseline value <URL and any of the following: new pathologic Q waves or LBBB, new native or graft vessel occlusion, imaging evidence of loss of viable myocardium |
| Spontaneous         | Troponin > URL or CK-MB > URL                                                                                    |                                                                                                                                                                   |
| Sudden death        | Death before biomarkers obtained or before expected to be elevated                                               | Symptoms suggestive of ischemia and any of the following: new ST elevation or LBBB, documented thrombus by angiography or autopsy                                 |
| Reinfarction        | Stable or decreasing values on 2 samples and 20% increase 3 to 6 hours after second sample diagnose recurrent MI | If biomarkers increasing or peak not reached then insufficient data to diagnose recurrent MI                                                                      |

1279 URL = Upper Reference Limit (defined 99th percentile of normal reference range); LBBB = Left Bundle-branch Block

1280 \* Baseline biomarker value requiring before study procedure and presumes a typical rise and fall  
1281

1282 Periprocedural MI After PCI: The periprocedural period includes the first 48 hours after percutaneous coronary  
1283 intervention.

1284 Periprocedural MI After CABG: The periprocedural period includes the first 72 hours after coronary artery bypass  
1285 grafting.

1286 Spontaneous MI: MI after the periprocedural period may be secondary to late stent complications or progression of  
1287 native disease. Performance of ECG and angiography supports adjudication to either a target or non-target vessel in  
1288 most cases.  
1289

1290 With the unique issues and pathophysiological mechanisms associated with these later events as well as the  
1291 documented adverse impact on short-and long-term prognosis, a more sensitive definition than for periprocedural MI of  
1292 any elevation of troponin above the upper range limit is used. All late events that are not associated with a  
1293 revascularization procedure should be classified as spontaneous.

1294  
1295 Electrocardiographic Classification: Within this category Q-wave MI and Non Q-wave MI are distinguished as  
1296 follows:

- 1297 ● Q-wave MI: Development of new pathologicals in 2 or more contiguous leads (according to the Minnesota  
1298 code as assessed by the ECG core laboratory) with or without post-procedure CK or CK-MB levels elevated  
1299 above normal.
- 1300 ● Non Q-wave MI: All MIs not classified as Q-wave.

1301  
1302 Relation to the Target Vessel: All infarcts that cannot be clearly attributed to a vessel other than the target vessel will  
1303 be considered related to the target vessel.

1304  
1305 **No-Reflow**  
1306 An acute reduction in coronary flow (TIMI grade 0-1) in the absence of dissection, thrombus, spasm, or high-grade  
1307 residual stenosis at the original target lesion. See also Abrupt Closure (Acute Closure)

1308  
1309 **Percent Diameter Stenosis (% DS)**  
1310 Calculated by the following:  
1311  $100 * \{1 - (\text{minimum lumen diameter} / \text{reference vessel diameter})\}$   
1312 using the mean values from 2 orthogonal views (when possible) determined by quantitative coronary angiography.

1313  
1314 **Permanent Impairment**  
1315 Permanent impairment means irreversible impairment or damage to a body structure or function, excluding trivial  
1316 impairment or damage.

1317  
1318 **Principal Investigator**  
1319 A physician-specialist responsible for overseeing trial conduct at all sites, protocol compliance, and relevant KFDA  
1320 regulations

1321  
1322 **Primary Investigator**  
1323 A physician responsible for conducting the study at each investigational site

1324  
1325 **Reference Vessel Diameter (RVD)**  
1326 The diameter of and adjacent reference segment that is presumed to be free of disease representing an approximation of  
1327 the target lesion vessel diameter. The reference vessel diameter is visually estimated during angiography by the  
1328 investigator and it is measured using quantitative coronary angiography by the angiographic core laboratory.

1329  
1330 **Repeat coronary revascularization**  
1331 See revascularization

1332  
1333 **Restenosis**  
1334 Re-narrowing of the artery following the removal or reduction of a previous narrowing.

1335  
1336 Binary restenosis: Percent diameter stenosis > 50% at angiographic follow-up

1337  
1338 **Revascularization**  
1339 Revascularization is defined by the Academic Research Consortium as follows:

1340

1341 Target lesion revascularization: TLR is defined as any repeat percutaneous intervention of the target lesion or bypass  
 1342 surgery of the target vessel performed for restenosis or other complication of the target lesion. All TLRs should be  
 1343 classified prospectively as clinically indicated\* or not clinically indicated by the investigator prior to repeat  
 1344 angiography. An independent angiographic core laboratory should verify that the severity of percent diameter stenosis  
 1345 meets requirements for clinical indication and will overrule in cases where investigator reports are not in agreement.  
 1346 The target lesion is defined as the treated segment from 5 mm proximal to the stent and to 5 mm distal to the stent.

1347 Target vessel Revascularization: TVR is defined as any repeat percutaneous intervention or surgical bypass of any  
 1348 segment of the target vessel. The target vessel is defined as the entire major coronary vessel proximal and distal to the  
 1349 target lesion, which includes upstream and downstream branches and the target lesion itself.

1350 Non Target Lesion Revascularization (non-TLR): Any revascularization in a lesion other than the target lesion is  
 1351 considered a non target lesion revascularization.

1352 Non Target Vessel Revascularization (non-TVR): Any revascularization in a vessel other than the target vessel is  
 1353 considered a non-target vessel revascularization.  
 1354

1355 \*Clinically indicated revascularization: A revascularization is considered clinically indicated if angiography at follow-  
 1356 up shows a percent diameter stenosis  $\geq 50\%$  (core laboratory quantitative coronary angiography assessment) and if one  
 1357 of the following occurs:

- 1358 (1) A positive history of recurrent angina pectoris, presumably related to the target vessel;  
 1359 (2) Objective signs of ischemia at rest (ECG changes) or during exercise test (or equivalent), presumably related to the  
 1360 target vessel;  
 1361 (3) Abnormal results of any invasive functional diagnostic test (eg, Doppler flow velocity reserve, fractional flow  
 1362 reserve);  
 1363 (4) A TLR or TVR with a diameter stenosis  $\geq 70\%$  even in the absence of the above-mentioned ischemic signs or  
 1364 symptoms.  
 1365

1366 **Stent Thrombosis**

1367 Stent thrombosis is defined and discussed by the Academic Research Consortium as follows:

1368 Stent thrombosis should be reported as a cumulative value at the different time points and with the different separate  
 1369 time points. Time 0 is defined as the time point after the guiding catheter has been removed and the subject left the  
 1370 catheterization laboratory.  
 1371

1372 Timing

|                              |                                            |
|------------------------------|--------------------------------------------|
| Acute stent thrombosis*      | 0-24 hours post stent implantation         |
| Subacute stent thrombosis*:  | > 24 hours-30 days post stent implantation |
| Late stent thrombosis†:      | > 30 days-1 year post stent implantation   |
| Very late stent thrombosis†: | > 1 year post stent implantation           |

1374 \* Acute/subacute can also be replaced by early stent thrombosis. Early stent thrombosis (0-30 days) is currently used in the community.

1375 † Including "primary" as well as "secondary" late stent thrombosis; "secondary" late stent thrombosis is a stent thrombosis after a target segment  
 1376 revascularization.  
 1377

1378 Stent Thrombosis Categories: a) Definite b) Probable, and c) Possible

1379 a) Definite stent thrombosis: Definite stent thrombosis is considered to have occurred by either angiographic or  
 1380 pathologic confirmation.

1382 Angiographic confirmation of stent thrombosis [\*The incidental angiographic documentation of stent occlusion in the absence of  
 1383 clinical signs or symptoms is not considered a confirmed stent thrombosis (silent occlusion).]; The presence of a thrombus [†Intracoronary  
 1384 thrombus] that originates in the stent or in the segment 5 mm proximal or distal to the stent and presence of at least 1  
 1385 of the following criteria within a 48-hour time window:

- 1386 . Acute onset of ischemic symptoms at rest  
 1387 . New ischemic ECG changes that suggest acute ischemia  
 1388 . Typical rise and fall in cardiac biomarkers (refer to definition of spontaneous MI)

**Confidential and Proprietary**

**Do not distribute or reproduce without prior written permission of the SMART CHOICE Investigator**

1389 . Nonocclusive thrombus: Intracoronary thrombus is defined as a (spheric, ovoid, or irregular) noncalcified filling  
1390 defect or lucency surrounded by contrast material (on 3 sides or within a coronary stenosis) seen in multiple  
1391 projections, or persistence of contrast material within the lumen, or a visible embolization of intraluminal material  
1392 downstream.

1393 . Occlusive thrombus: TIMI 0 or TIMI 1 intrastent or proximal to a stent up to the most adjacent proximal side  
1394 branch or main branch (if originates from the side branch).

1395 Pathological confirmation of stent thrombosis: Evidence of recent thrombus within the stent determined at autopsy  
1396 or via examination of tissue retrieved following thrombectomy.

1397 b) Probable stent thrombosis: Clinical definition of probable stent thrombosis is considered to have occurred after  
1398 intracoronary stenting in the following cases:

1399 . Any unexplained death within the first 30 days [† For studies with ST-elevation MI population, one may consider the exclusion of  
1400 unexplained death within 30 days as evidence of probable stent thrombosis.]

1401 . Irrespective of the time after the index procedure, any MI that is related to documented acute ischemia in the  
1402 territory of the implanted stent without angiographic confirmation of stent thrombosis and in the absence of any  
1403 other obvious cause

1404 c) Possible stent thrombosis: Clinical definition of possible stent thrombosis is considered to have occurred with any  
1405 unexplained death from 30 days after intracoronary stenting until end of trial follow-up.

1406

**Stroke**

1407 See Cerebrovascular Accident

1408

1409

**Suboptimal result**

1410 Residual stenosis > 10% within the stented segment

1411 Any peri-stent dissection ≥ NHLMI type B.

1412 Lucency or filling defect consistent with thrombus.

1413 No reflow or TIMI 2 flow.

1414 Unstented inflow or outflow stenosis ≥60% diameter stenosis (visually assessed).

1415

1416

1417

1418

**Successful Stent Implantation**

1419 10% or less residual stenosis by visual assessment over the entire stent length, with TIMI – 3 flow and no more than an  
1420 NHLBI type A peri-stent dissection.

1421

1422

**Target Lesion**

1423 A lesion to be treated during the index procedure

1424

1425

1426

**Target Vessel**

1427 The entire epicardial vessel containing the treated lesion

1428

1429

1430

**Thrombocytopenia**

1431 Thrombocytopenia: Nadir platelet count <100,000 cells/mm<sup>3</sup> in a patient with a baseline platelet count >100,000  
1432 cells/mm<sup>3</sup>. Further divided into mild (50,000 - <100,000 cells/mm<sup>3</sup>), moderate (20,000 - <50,000 cells/mm<sup>3</sup>), or  
1433 severe (<20,000 cells/mm<sup>3</sup>, or requiring platelet transfusion).

1434

1435

1436

**Thrombosis in Myocardial Infarction (TIMI) Flow Grades**

1437 Definitions of perfusion in the TIMI Trial

1438 Grade 0 (no perfusion): There is no antegrade flow beyond the point of occlusion.

1439

1440 Grade 1 (penetration with minimal perfusion): The contrast material passes beyond the area of obstruction, but "hangs  
1441 up" and fails to opacify the entire coronary bed distal to the obstruction for duration of the cine run.

1442 Grade 2 (partial perfusion): The contrast material passes across the obstruction and opacifies the coronary bed distal to  
1443 the obstruction. However, the rate of entry of contrast material into the vessel distal to the obstruction or its rate of  
1444 clearance from the distal bed (or both) are perceptibly slower than its entry into or clearance from comparable areas not  
1445 perfused by the previously occluded vessel, e.g., the opposite coronary artery or the coronary bed proximal to the  
1446 obstruction.

1447 Grade 3 (complete perfusion): Antegrade flow into the bed distal to the obstruction occurs as promptly as antegrade  
1448 flow into the bed proximal to the obstruction, and clearance of contrast material from the involved bed is as rapid as  
1449 clearance from an uninvolved bed in the same vessel or the opposite artery.

1450

### 1451 **Transient Ischemic Neurological Attack (TIA)**

1452 A sudden onset of reversible focal neurological deficits due to vascular lesions of the brain that lasts  $\leq$  24 hours

1453

1454

### 1455 **Unanticipated Adverse Device Effect (UADE)**

1456 Any serious adverse effect on health or safety or any life-threatening problem or death caused by, or associated with, a  
1457 device, if that effect, problem, or death was not previously identified in nature, severity, or degree of incidence in the  
1458 investigational plan or application (including a supplementary plan or application), or any other unanticipated serious  
1459 problem associated with a device that relates to the rights, safety, or welfare of patients.

1460

1461

1462

1463

1464

1465

1466

1467

1468

1469

1470

1471

1472

1473

1474

1475

1476

1477

1478 **Appendix B: Angiographic Core Lab Guidelines**

1479  
1480 To improve accuracy and reproducibility in off-line QCA measurements, the following guidelines should be  
1481 respected.

- 1482
- 1483 • Use a fixed table system
- 1484 Use a CD-ROM at a minimum speed of preferably 25-30 frames/ second; Cinefilms are not allowed
- 1485 The image mode of the image intensifier should be 5 inch (13 cm) or 7 inch (18 cm);
- 1486 It is mandatory to use catheters of 6 French or larger;
- 1487 The catheter tip must be clearly visible in each projection, preferably near the center of the screen (essential  
1488 for calibration). With tapered catheter, an even larger portion of the catheter must be present;
- 1489 Flush the catheter tip after each contrast injection; Contrast can be cleared from the catheter tip by back  
1490 bleeding (e.g., by briefly opening the Y-connector or the pressure line to air)
- 1491 Pre-procedural and final angiograms must be obtained, during breath hold, without a guidewire in the  
1492 coronary artery;
- 1493 At least 2 different projections, for the right coronary artery and at least 3 different projections for the left  
1494 coronary artery must be filmed, with at least 30° difference before the PCI/Stent. These same projections  
1495 must be repeated after PCI/Stent and at follow-up angiography, preferably without a guidewire in place;
- 1496 There should be no overlap of the lesion to be dilated with other vessels, catheters or electrodes;
- 1497 Foreshortening of the segment should be avoided and stenosis should be viewed in their maximal severity;
- 1498 The segment to be dilated should preferably be located near the center of the screen;
- 1499 Each angiogram has to be preceded by intra-coronary injection of nitrates and repeated if necessary, this  
1500 must appear on the film (use plates);
- 1501 The balloon of the delivery system or any subsequent balloon inflated within a stent must be filmed at  
1502 maximum inflation pressure. The pressure applied must also be visible on the film (use plates);
- 1503 ( Record the complete filming sequence for each site to be dilated in the "Technician Work Sheet"(TWS)  
1504 sections of the Case Report Form;
- 1505 ( N.B. In case the angulations of all angiographic projections are displayed in the Dicom image of the CD-  
1506 ROM, the listing of the filming sequence (columns 1 and 2 of T.W.S.) may be skipped. However, The  
1507 information in the 3rd column (i.e. field size, catheter number etc.) is mandatory.
- 1508
- 1509 ( The procedure is completed when the guiding catheter is removed and the patient is off the table. If the  
1510 guiding catheter is reinserted, this should be considered as a repeat intervention;
- 1511 ( If there is a long lesion covering more than one segment, always identify the site by the segment number in  
1512 which the lesion begins;
- 1513 ( It is important to use same type of contrast material for baseline and follow-up angiograms.
- 1514 In addition, it is of key importance to
- 1515 - film all balloon dilatations
  - 1516 - film deflated balloon while it remains at site of inflation
  - 1517 - film any stent placement.

1518  
1519  
1520  
1521

1522 **References**

- 1523
- 1524 1.Task Force on Myocardial Revascularization of the European Society of C, the European Association for  
1525 Cardio-Thoracic S, European Association for Percutaneous Cardiovascular I, Wijns W, Kolh P, Danchin N,  
1526 Di Mario C, Falk V, Folliguet T, Garg S, Huber K, James S, Knuuti J, Lopez-Sendon J, Marco J, Menicanti  
1527 L, Ostojic M, Piepoli MF, Pirlet C, Pomar JL, Reifart N, Ribichini FL, Schalij MJ, Sergeant P, Serruys PW,  
1528 Silber S, Sousa Uva M, Taggart D. Guidelines on myocardial revascularization. *Eur Heart J.* 2010;31:2501-  
1529 2555.
- 1530 2.Levine GN, Bates ER, Blankenship JC, Bailey SR, Bittl JA, Cercek B, Chambers CE, Ellis SG, Guyton  
1531 RA, Hollenberg SM, Khot UN, Lange RA, Mauri L, Mehran R, Moussa ID, Mukherjee D, Nallamothu BK,  
1532 Ting HH. 2011 ACCF/AHA/SCAI Guideline for Percutaneous Coronary Intervention: a report of the  
1533 American College of Cardiology Foundation/American Heart Association Task Force on Practice  
1534 Guidelines and the Society for Cardiovascular Angiography and Interventions. *Circulation.* 2011;124:e574-  
1535 651.
- 1536 3.Pfisterer M, Brunner-La Rocca HP, Buser PT, Rickenbacher P, Hunziker P, Mueller C, Jeger R, Bader F,  
1537 Osswald S, Kaiser C, Investigators B-L. Late clinical events after clopidogrel discontinuation may limit the  
1538 benefit of drug-eluting stents: an observational study of drug-eluting versus bare-metal stents. *J Am Coll*  
1539 *Cardiol.* 2006;48:2584-2591.
- 1540 4.Daemen J, Wenaweser P, Tsuchida K, Abrecht L, Vaina S, Morger C, Kukreja N, Juni P, Sianos G,  
1541 Hellige G, van Domburg RT, Hess OM, Boersma E, Meier B, Windecker S, Serruys PW. Early and late  
1542 coronary stent thrombosis of sirolimus-eluting and paclitaxel-eluting stents in routine clinical practice: data  
1543 from a large two-institutional cohort study. *Lancet.* 2007;369:667-678.
- 1544 5.Park SJ, Park DW, Kim YH, Kang SJ, Lee SW, Lee CW, Han KH, Park SW, Yun SC, Lee SG, Rha SW,  
1545 Seong IW, Jeong MH, Hur SH, Lee NH, Yoon J, Yang JY, Lee BK, Choi YJ, Chung WS, Lim DS, Cheong  
1546 SS, Kim KS, Chae JK, Nah DY, Jeon DS, Seung KB, Jang JS, Park HS, Lee K. Duration of dual antiplatelet  
1547 therapy after implantation of drug-eluting stents. *N Engl J Med.* 2010;362:1374-1382.
- 1548 6.Gwon HC, Hahn JY, Park KW, Song YB, Chae IH, Lim DS, Han KR, Choi JH, Choi SH, Kang HJ, Koo  
1549 BK, Ahn T, Yoon JH, Jeong MH, Hong TJ, Chung WY, Choi YJ, Hur SH, Kwon HM, Jeon DW, Kim BO,  
1550 Park SH, Lee NH, Jeon HK, Jang Y, Kim HS. Six-month versus 12-month dual antiplatelet therapy after  
1551 implantation of drug-eluting stents: the Efficacy of Xience/Promus Versus Cypher to Reduce Late Loss  
1552 After Stenting (EXCELLENT) randomized, multicenter study. *Circulation.* 2012;125:505-513.
- 1553 7.Valgimigli M, Campo G, Monti M, Vranckx P, Percoco G, Tumscitz C, Castriota F, Colombo F, Tebaldi  
1554 M, Fuca G, Kubbaejeh M, Cangiano E, Minarelli M, Scalone A, Cavazza C, Frangione A, Borghesi M,  
1555 Marchesini J, Parrinello G, Ferrari R, Prolonging Dual Antiplatelet Treatment After Grading Stent-Induced  
1556 Intimal Hyperplasia Study I. Short- versus long-term duration of dual-antiplatelet therapy after coronary  
1557 stenting: a randomized multicenter trial. *Circulation.* 2012;125:2015-2026.
- 1558 8.Bangalore S, Kumar S, Fusaro M, Amoroso N, Attubato MJ, Feit F, Bhatt DL, Slater J. Short- and long-  
1559 term outcomes with drug-eluting and bare-metal coronary stents: a mixed-treatment comparison analysis of  
1560 117 762 patient-years of follow-up from randomized trials. *Circulation.* 2012;125:2873-2891.
- 1561 9.Palmerini T, Biondi-Zoccai G, Della Riva D, Stettler C, Sangiorgi D, D'Ascenzo F, Kimura T, Briguori C,  
1562 Sabate M, Kim HS, De Waha A, Kedhi E, Smits PC, Kaiser C, Sardella G, Marullo A, Kirtane AJ, Leon MB,



**Confidential and Proprietary**

**Do not distribute or reproduce without prior written permission of the SMART CHOICE Investigator**

- 1563 Stone GW. Stent thrombosis with drug-eluting and bare-metal stents: evidence from a comprehensive  
1564 network meta-analysis. *Lancet*. 2012;379:1393-1402.
- 1565 10.Feres F, Costa RA, Abizaid A, Leon MB, Marin-Neto JA, Botelho RV, King SB, 3rd, Negoita M, Liu M,  
1566 de Paula JE, Mangione JA, Meireles GX, Castello HJ, Jr., Nicoleta EL, Jr., Perin MA, Devito FS, Labrunie  
1567 A, Salvadori D, Jr., Gusmao M, Staico R, Costa JR, Jr., de Castro JP, Abizaid AS, Bhatt DL, for the OTI.  
1568 Three vs Twelve Months of Dual Antiplatelet Therapy After Zotarolimus-Eluting Stents: The OPTIMIZE  
1569 Randomized Trial. *JAMA*. 2013.
- 1570 11.Yusuf S, Zhao F, Mehta SR, Chrolavicius S, Tognoni G, Fox KK, Clopidogrel in Unstable Angina to  
1571 Prevent Recurrent Events Trial I. Effects of clopidogrel in addition to aspirin in patients with acute coronary  
1572 syndromes without ST-segment elevation. *N Engl J Med*. 2001;345:494-502.
- 1573 12.Hallas J, Dall M, Andries A, Andersen BS, Aalykke C, Hansen JM, Andersen M, Lassen AT. Use of  
1574 single and combined antithrombotic therapy and risk of serious upper gastrointestinal bleeding: population  
1575 based case-control study. *BMJ*. 2006;333:726.
- 1576 13.Iwata Y, Kobayashi Y, Fukushima K, Kitahara H, Asano T, Ishio N, Nakayama T, Kuroda N, Komuro I.  
1577 Incidence of premature discontinuation of antiplatelet therapy after sirolimus-eluting stent implantation. *Circ*  
1578 *J*. 2008;72:340-341.
- 1579 14.Committee CS. A randomised, blinded, trial of clopidogrel versus aspirin in patients at risk of ischaemic  
1580 events (CAPRIE). CAPRIE Steering Committee. *Lancet*. 1996;348:1329-1339.
- 1581 15. Glenn NL, Eric RB, James CB, et al. 2011 ACCF/AHA/SCAI Guideline for Percutaneous Coronary  
1582 Intervention: A Report of the American College of Cardiology Foundation/American Heart Association  
1583 Task Force on Practice Guidelines and the Society for Cardiovascular Angiography and Interventions. *J Am*  
1584 *Coll Cardiol* 2011;58:e44-e122.
- 1585 16. King SB 3rd, Smith SC Jr, Hirshfeld JW Jr, Jacobs AK, Morrison DA, Williams DO, Feldman TE, Kern  
1586 MJ, O'Neill WW, Schaff HV, Whitlow PL. 2007 Focused Update of the ACC/AHA/SCAI 2005 Guideline  
1587 Update for Percutaneous Coronary Intervention. A Report of the American College of Cardiology/American  
1588 Heart Association Task Force on Practice Guidelines.*Circulation*. 2007 Dec 13;
- 1589 17. Sidney CS, Emelia JB, Robert OB et al.; AHA/ACCF Secondary Prevention and Risk Reduction  
1590 Therapy for Patients With Coronary and Other Atherosclerotic Vascular Disease: 2011 Update  
1591 A Guideline From the American Heart Association and American College of Cardiology Foundation  
1592 Endorsed by the World Heart Federation and the Preventive Cardiovascular Nurses Association. *J Am Coll*  
1593 *Cardiol*. 2011;58:2432-2446.
- 1594 18. Adult Treatment Panel III National Cholesterol Education Program. Third report  
1595 of the expert panel on detection, evaluation, and treatment of high blood cholesterol in adults. NIH Pub. No.  
1596 02-5215. Bethesda, MD: National Heart, Lung, and Blood Institute, 2002;284 pages.
- 1597 19. Chobanian AV, Bakris GL, Black HR, Cushman WC, Green LA, Izzo JL, Jr., et al. Seventh report of the  
1598 Joint National Committee on prevention, detection, evaluation, and treatment of high blood pressure.  
1599 Hypertension. 2003;42:1206-52.

**Confidential and Proprietary**

**Do not distribute or reproduce without prior written permission of the SMART CHOICE Investigator**

1600 20. Frederick GK, Mary H, Sidney CS, et al 2009 Focused Updates: ACC/AHA Guidelines for the  
1601 Management of Patients With ST-Elevation Myocardial Infarction (Updating the 2004 Guideline and 2007  
1602 Focused Update) and ACC/AHA/SCAI Guidelines on Percutaneous Coronary Intervention (Updating the  
1603 2005 Guideline and 2007 Focused Update): A Report of the American College of Cardiology  
1604 Foundation/American Heart Association Task Force on Practice Guidelines. *J Am Coll Cardiol.*  
1605 2007;54:2205-41.

1606 21. R.Scott Wright, Jeffrey LA, Cynthia DA, et al. 2011 ACCF/AHA Focused Update Incorporated Into the  
1607 ACC/AHA 2007 Guidelines for the Management of Patients With Unstable Angina/Non-ST-Elevation  
1608 Myocardial Infarction. *J Am Coll Cardiol.* 2011;57:1920-59.

1609 22. Mehran R, Rao SV, Bhatt DL, Gibson CM, Caixeta A, Eikelboom J, Kaul S, Wiviott SD, Menon V,  
1610 Nikolsky E, Serebruany V, Valgimigli M, Vranckx P, Taggart D, Sabik JF, Cutlip DE, Krucoff MW,  
1611 Ohman EM, Steg PG, White H. Standardized bleeding definitions for cardiovascular clinical trials: a  
1612 consensus report from the Bleeding Academic Research Consortium. *Circulation.* 2011 Jun  
1613 14;123(23):2736-47.

1614

1615

## Statistical Analysis Plan for SMART-CHOICE Trial

1616

### 1.1 Statistical Overview

1618

1619

1620

1621

1622

This trial is a prospective, open label, two-arm, randomized multi-center trial to test the noninferiority of P2Y12 antagonist monotherapy compared with aspirin plus P2Y12 antagonist following 3-month of DAPT after DES implantation.

1623

1624

1625

1626

1627

1628

1629

1630

1631

1632

1633

1634

1635

1636

### 1.2 Sample Size

Hypothesis: P2Y12 antagonist monotherapy is noninferior to aspirin plus P2Y12 antagonist therapy in reducing ischemic events and bleeding risk after 3-month DAPT.

The study is a noninferiority trial. For the primary endpoint, we assume the incremental rate of composite events at 12-month follow-up will be 4.0% in both groups based on the results from previous studies.<sup>6,7</sup> The non-inferiority margin of 1.8 percentage points is chosen.

Sampling ratio is 1:1 = P2Y12 antagonist monotherapy : aspirin plus P2Y12 antagonist therapy

With a total of 3,000 patients (1,500 per group), the power of the study will be at least 80% with a 1-sided type I error rate of 0.05 and a loss to follow-up rate of 2%.

### 1.3 Randomization

1637 Randomization will be performed 1:1 between P2Y12 antagonist and aspirin plus P2Y12  
1638 antagonist stratified by stent type, acute coronary syndrome, and enrolling sites. A written informed  
1639 consent will be obtained from all patients. After obtaining informed consent, patients will be  
1640 screened for eligibility and, if qualified, will be randomly assigned to a treatment group using a  
1641 web-based response system (<http://www.ecrf.kr/smartchoice>) by computer-generated block  
1642 randomization, and was stratified by clinical presentation (stable ischemic heart disease or acute  
1643 coronary syndrome), enrolling center, type of P2Y12 receptor antagonist (clopidogrel, prasugrel, or  
1644 ticagrelor), and type of stents used.

1645

#### 1646 **1.4 Analysis**

##### 1647 **General**

1648 Continuous variables will be presented as mean  $\pm$  SD and compared with the Student t test.  
1649 Categorical variables will be presented as counts and percentages and compared with the  $\chi^2$  or  
1650 Fisher exact test as appropriate. End points will be analyzed with the use of time-to-event methods.  
1651 Cumulative event rates will be estimated with the Kaplan–Meier method and compared using log-  
1652 rank tests. Hazard ratios with 95% confidence interval (CI) will be estimated by the Cox  
1653 proportional-hazards method. Landmark analysis at 3 months from the index procedure will be  
1654 separately performed as major secondary analysis. Patients who are lost to follow-up will be  
1655 censored at the time of the last known contact.

1656

##### 1657 **Analysis Populations**

1658 All primary and secondary endpoints will be analyzed both on an intention-to-treat basis  
1659 (all patients analyzed as part of their assigned treatment group) and on a per protocol basis (patients

1660 analyzed as part of their assigned treatment group only if they actually received their assigned  
1661 treatment. For an intention-to-treat analysis, all patients who signed the written informed consent  
1662 form and are randomized in the study will be included in the analysis sample, regardless of whether  
1663 or not the correct treatment was administered, or whether crossover occurred. For the per protocol  
1664 analysis, only enrolled patients who actually received the assigned treatment will be included in the  
1665 analysis sample.

1666

1667 **Primary Endpoint Analysis**

1668 The primary endpoint will be analyzed on an intention-to-treat and per protocol basis. The null  
1669 hypothesis will be evaluated on the intention-to-treat population using an inferiority statistic. If the  
1670 upper limit of the 1-sided 95% CI of the difference is less than that of the prespecified non-  
1671 inferiority margin, P2Y12 inhibitor monotherapy will be considered to be noninferior to  
1672 conventional 12-month duration of DAPT.

1673

1674 **Subgroup Analyses**

1675 1. Major subgroup analyses of the primary and major secondary endpoints will be performed:

1676 (1) ACS

1677 (2) Diabetes mellitus

1678 (3) Implanted stent type

1679 (4) Type of P2Y12 inhibitor (clopidogrel, prasugrel, or ticagrelor)

1680 (5) Chronic kidney disease, defined as estimated glomerular filtration rate  $<60$  ml/min/m<sup>2</sup>

1681 (6) Multivessel PCI

1682 → The consistency of treatment effects in prespecified subgroups will be assessed using Cox  
1683 regression models with tests for interaction.

1684

1685 **Treatment of missing values**

1686 The primary analysis of the study end points will not be covariate adjusted. No imputation methods  
1687 will be used to infer missing values of baseline variables. For the study end points, we will censor  
1688 patients lost to follow-up and regard them as not having the primary end point when estimating  
1689 Kaplan–Meier event rates.

1690

1691
