# Supplementary material
Source: PubMed Central journal article supplement (PMC6593635)
Supplement: jama-321-2428-s002.pdf [file jama-321-2428-s002.pdf]

## Supplementary Online Content

Hahn J-Y, Song YB, Oh J-H, et al. Efficacy of P2Y12 inhibitor monotherapy vs dual antiplatelet therapy on cardiovascular events in patients undergoing percutaneous coronary intervention: the SMART-CHOICE randomized clinical trial. Published June 25, 2019. *JAMA*. doi:10.1001/jama.2019.8146

**eTable 1.** Inclusion and Exclusion Criteria

**eTable 2.** Discharge medication

**eTable 3.** Clinical outcomes by per-protocol analysis

**eFigure 1.** Treatment Difference for the Major Adverse Cardiovascular and Cerebrovascular Events

**eFigure 2.** Time-to-event curves for the end points in the per-protocol population

**eFigure 3.** Time-to-event curves and landmark analysis for all-cause death in the intention-to-treat population

**eFigure 4.** Time-to-event curves and landmark analysis for myocardial infarction in the intention-to-treat population

**eFigure 5.** Time-to-event curves and landmark analysis for stroke in the intention-to-treat population

**eFigure 6.** Subgroup Analyses of the Major Adverse Cardiovascular and Cerebrovascular Events (Primary End Point) at 12 Months

**eFigure 7.** Subgroup Analyses of BARC type 2-5 Bleeding at 12 Months

This supplementary material has been provided by the authors to give readers additional information about their work.

**eTable 1. Inclusion and Exclusion Criteria**

---

| <b>Inclusion criteria</b> |                                                                                                                                                                                                                                                                                    |
|---------------------------|------------------------------------------------------------------------------------------------------------------------------------------------------------------------------------------------------------------------------------------------------------------------------------|
| 1.                        | Patients must be at least 20 years of age.                                                                                                                                                                                                                                         |
| 2.                        | Patients are able to verbally confirm understandings of risks, benefits and treatment alternatives of receiving percutaneous coronary intervention and he/she or his/her legally authorized representative provides written informed consent prior to any study related procedure. |
| 3.                        | Patients should have undergone successful percutaneous coronary intervention with drug-eluting stent for stable ischemic heart disease or acute coronary syndrome                                                                                                                  |
| 4.                        | Patients must have one or more coronary stenosis of 50% or more in a native coronary artery with visually estimated diameter of $\geq 2.25$ mm and $\leq 4.25$ mm eligible for stent implantation.                                                                                 |
| 5.                        | Target lesion(s) must be amenable for percutaneous coronary intervention                                                                                                                                                                                                           |

---

| <b>Exclusion criteria</b> |                                                                                                                                                                        |
|---------------------------|------------------------------------------------------------------------------------------------------------------------------------------------------------------------|
| 1.                        | Patients with a known hypersensitivity or contraindication to any of the following medications: Aspirin, Clopidogrel, Prasugrel, Ticagrelor, Everolimus, or Sirolimus  |
| 2.                        | Hemodynamic instability or cardiogenic shock                                                                                                                           |
| 3.                        | Patients with active pathologic bleeding including gastrointestinal or genitourinary bleeding                                                                          |
| 4.                        | Drug-eluting stent implantation within 12 months before index procedure                                                                                                |
| 5.                        | Female of childbearing potential, unless a recent pregnancy test is negative, who possibly plan to become pregnant any time after enrollment into this study.          |
| 6.                        | Non-cardiac co-morbid conditions are present with life expectancy $< 2$ year or that may result in protocol non-compliance (per site investigator's medical judgment). |
| 7.                        | Patients who are actively participating in another drug or device investigational study, which have not completed the primary endpoint follow-up period.               |

---

**eTable 2. Discharge medication**

|                               | <b>P2Y12 inhibitor monotherapy<br/>(n=1495)</b> | <b>DAPT<br/>(n=1498)</b> |
|-------------------------------|-------------------------------------------------|--------------------------|
| Discharge medication, No. (%) |                                                 |                          |
| Aspirin                       | 1492/1495 (99.8)                                | 1496/1498 (99.9)         |
| P2Y12 receptor inhibitor      | 1493/1495 (99.9)                                | 1496/1498 (99.9)         |
| Clopidogrel                   | 1149/1495 (76.9)                                | 1163/1498 (77.6)         |
| Prasugrel                     | 62/1495 (4.1)                                   | 67/1498 (4.5)            |
| Ticagrelor                    | 284/1495 (19.0)                                 | 268/1498 (17.9)          |
| Statin                        | 1416/1495 (94.7)                                | 1408/1497 (94.1)         |
| ACE inhibitor                 | 271/1492 (18.2)                                 | 256/1495 (17.1)          |
| ARB                           | 601/1492 (40.3)                                 | 560/1496 (37.4)          |
| $\beta$ -blocker              | 795/1494 (53.2)                                 | 783/1496 (52.3)          |

There were no significant between-group differences in discharge medication.

Abbreviations: ACE, angiotensin converting enzyme; ARB, angiotensin receptor blocker; DAPT, dual antiplatelet therapy.

**eTable 3. Clinical outcomes by per-protocol analysis**

| Outcome                                                         | P2Y12 inhibitor monotherapy (n=1185) <sup>a</sup> | Dual antiplatelet therapy (n=1426) <sup>a</sup> | Estimate of Difference (95% 1-Sided CI) | P Value for noninferiority |
|-----------------------------------------------------------------|---------------------------------------------------|-------------------------------------------------|-----------------------------------------|----------------------------|
| <b>Primary end point</b>                                        |                                                   |                                                 |                                         |                            |
| MACCE <sup>b</sup> , No. (%)                                    | 36 (3.1)                                          | 35 (2.5)                                        | 0.6% (-∞% to 1.5%)                      | .02                        |
| <b>Secondary end points</b>                                     |                                                   |                                                 | <b>Hazard Ratio (95% CI)</b>            | <b>P Value</b>             |
| Death, No. (%)                                                  | 21 (1.8%)                                         | 18 (1.3%)                                       | 1.42 (0.75-2.66)                        | .28                        |
| Myocardial infarction, No. (%)                                  | 10 (0.9%)                                         | 17 (1.2%)                                       | 0.72 (0.33-1.56)                        | .40                        |
| Stroke, No. (%)                                                 | 6 (0.5%)                                          | 4 (0.3%)                                        | 1.82 (0.51-6.46)                        | .35                        |
| Cardiac death, No. (%)                                          | 11 (0.9%)                                         | 13 (0.9%)                                       | 1.03 (0.46-2.29)                        | .95                        |
| Stent thrombosis, No. (%)                                       | 3 (0.3%)                                          | 2 (0.1%)                                        | 1.81 (0.30-10.8)                        | .52                        |
| Bleeding BARC type 2-5, No. (%)                                 | 21 (1.8%)                                         | 44 (3.1%)                                       | 0.58 (0.34-0.97)                        | .04                        |
| Major bleeding <sup>c</sup> , No. (%)                           | 8 (0.7%)                                          | 12 (0.8%)                                       | 0.81 (0.33-1.98)                        | .65                        |
| <b>Post hoc analysis</b>                                        |                                                   |                                                 |                                         |                            |
| Death or myocardial infarction, No. (%)                         | 30 (2.5%)                                         | 32 (2.3%)                                       | 1.14 (0.69-1.87)                        | .61                        |
| Cardiac death or myocardial infarction, No. (%)                 | 21 (1.8%)                                         | 27 (1.9%)                                       | 0.95 (0.53-1.67)                        | .85                        |
| Net adverse clinical and cerebral events <sup>d</sup> , No. (%) | 53 (4.5%)                                         | 75 (5.3%)                                       | 0.85 (0.60-1.21)                        | .38                        |

Abbreviations: BARC, Bleeding Academic Research Consortium; CI, confidence interval; HR, hazard ratio; and MACCE, major adverse cardiac and cerebrovascular events.

<sup>a</sup> Data are presented for the intention-to-treat population. The percentages are Kaplan–Meier estimates.

<sup>b</sup> A composite of all-cause mortality, myocardial infarction, or stroke.

<sup>c</sup> BARC type 3-5 bleeding.

<sup>d</sup> MACCE plus BARC type 2-5 bleeding.

**eFigure 1. Treatment Difference for the Major Adverse Cardiovascular and Cerebrovascular Events**

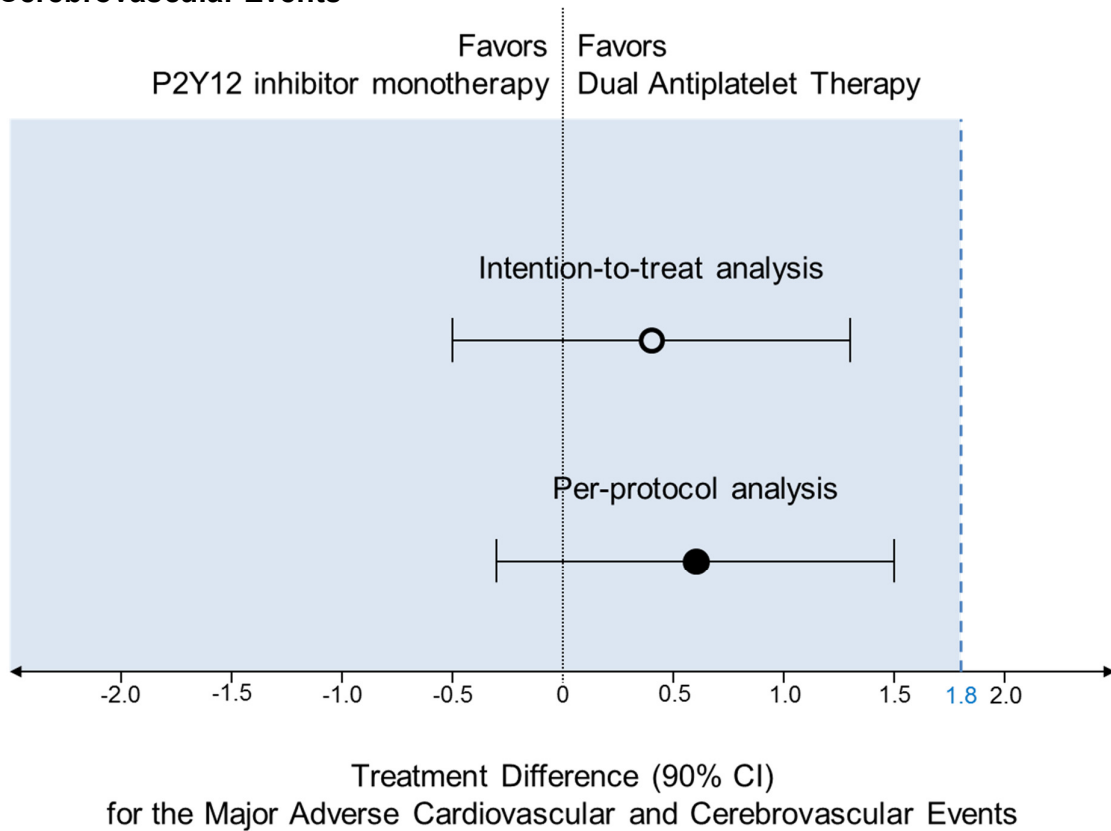

“Blue dashed line at treatment difference = 1.8 indicates noninferiority margin; blue-tinted region to the left of treatment difference = 1.8 indicates values for which P2Y12 inhibitor monotherapy would be considered noninferior to dual antiplatelet therapy. CI indicates confidence interval.”

**eFigure 2. Time-to-event curves for the end points in the per-protocol population**

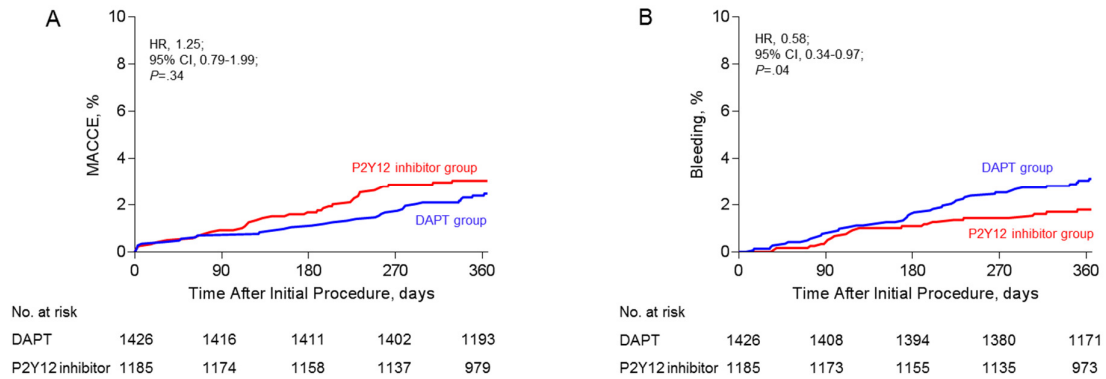

Panel A shows the results of the analysis of the primary end point of major adverse cardiovascular and cerebrovascular events (a composite of death, myocardial infarction, or stroke) at 12 months. Panel B shows the results of the analysis of the bleeding at 12 months. Event rates were based on Kaplan–Meier estimates in time-to-first-event analyses. Hazard ratios are for the patients in the P2Y12 inhibitor monotherapy group. CI indicates confidence interval; DAPT, dual antiplatelet therapy; HR, hazard ratio; MACCE, major adverse cardiac and cerebrovascular events.

**eFigure 3. Time-to-event curves and landmark analysis for all-cause death in the intention-to-treat population**

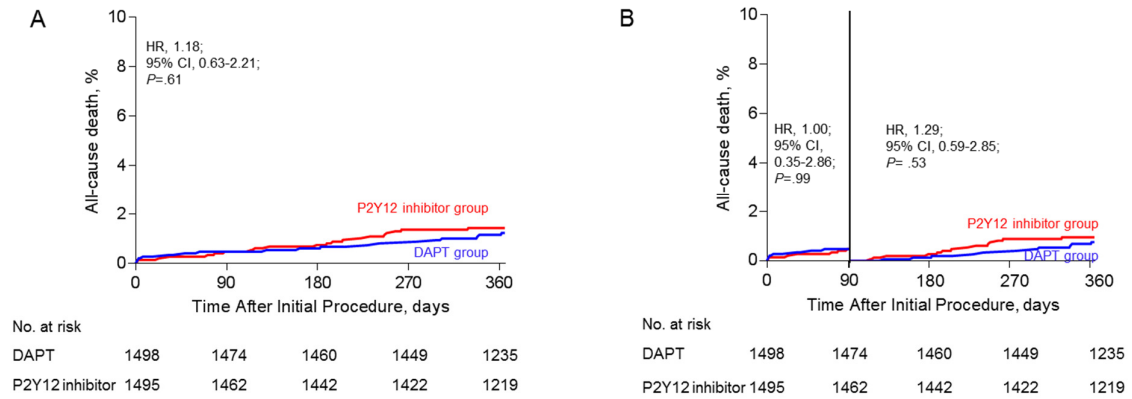

Panel A shows the results of the analysis of the all-cause death at 12 months. Results of the landmark analysis at 3 months of the all-cause death are shown in Panel B. Event rates were based on Kaplan–Meier estimates in time-to-first-event analyses. Hazard ratios are for the patients in the P2Y12 inhibitor monotherapy group. CI indicates confidence interval; DAPT, dual antiplatelet therapy; HR, hazard ratio.

**eFigure 4. Time-to-event curves and landmark analysis for myocardial infarction in the intention-to-treat population**

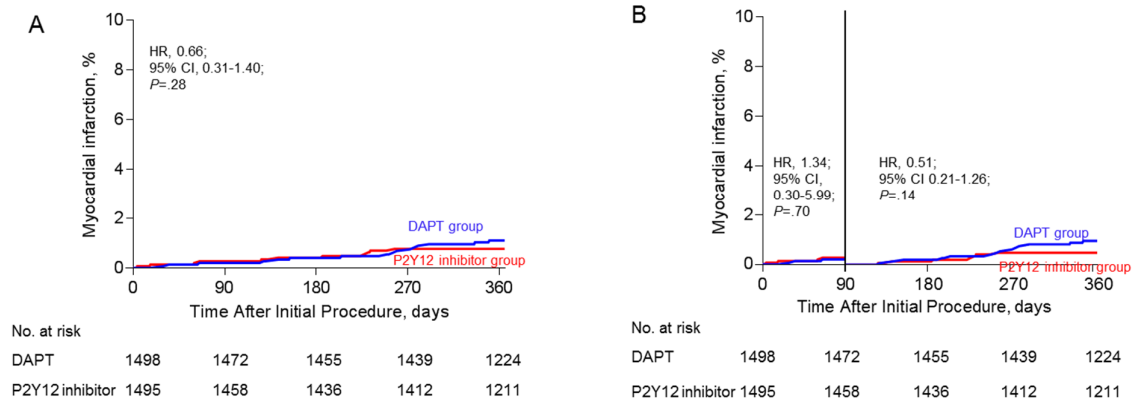

Panel A shows the results of the analysis of the myocardial infarction at 12 months. Results of the landmark analysis at 3 months of the myocardial infarction are shown in Panel B. Event rates were based on Kaplan–Meier estimates in time-to-first-event analyses. Hazard ratios are for the patients in the P2Y12 inhibitor monotherapy group. CI indicates confidence interval; DAPT, dual antiplatelet therapy; HR hazard ratio.



**eFigure 5. Time-to-event curves and landmark analysis for stroke in the intention-to-treat population**

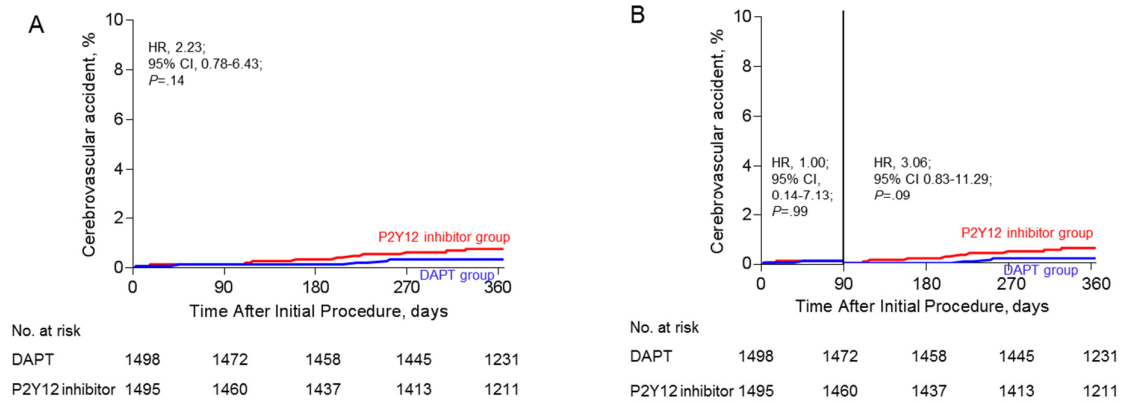

Panel A shows the results of the analysis of the stroke at 12 months. Results of the landmark analysis at 3 months of the stroke shown in Panel B. Event rates were based on Kaplan–Meier estimates in time-to-first-event analyses. Hazard ratios are for the patients in the P2Y12 inhibitor monotherapy group. CI indicates confidence interval; DAPT, dual antiplatelet therapy; HR, hazard ratio.

**eFigure 6. Subgroup Analyses of the Major Adverse Cardiovascular and Cerebrovascular Events (Primary End Point) at 12 Months**

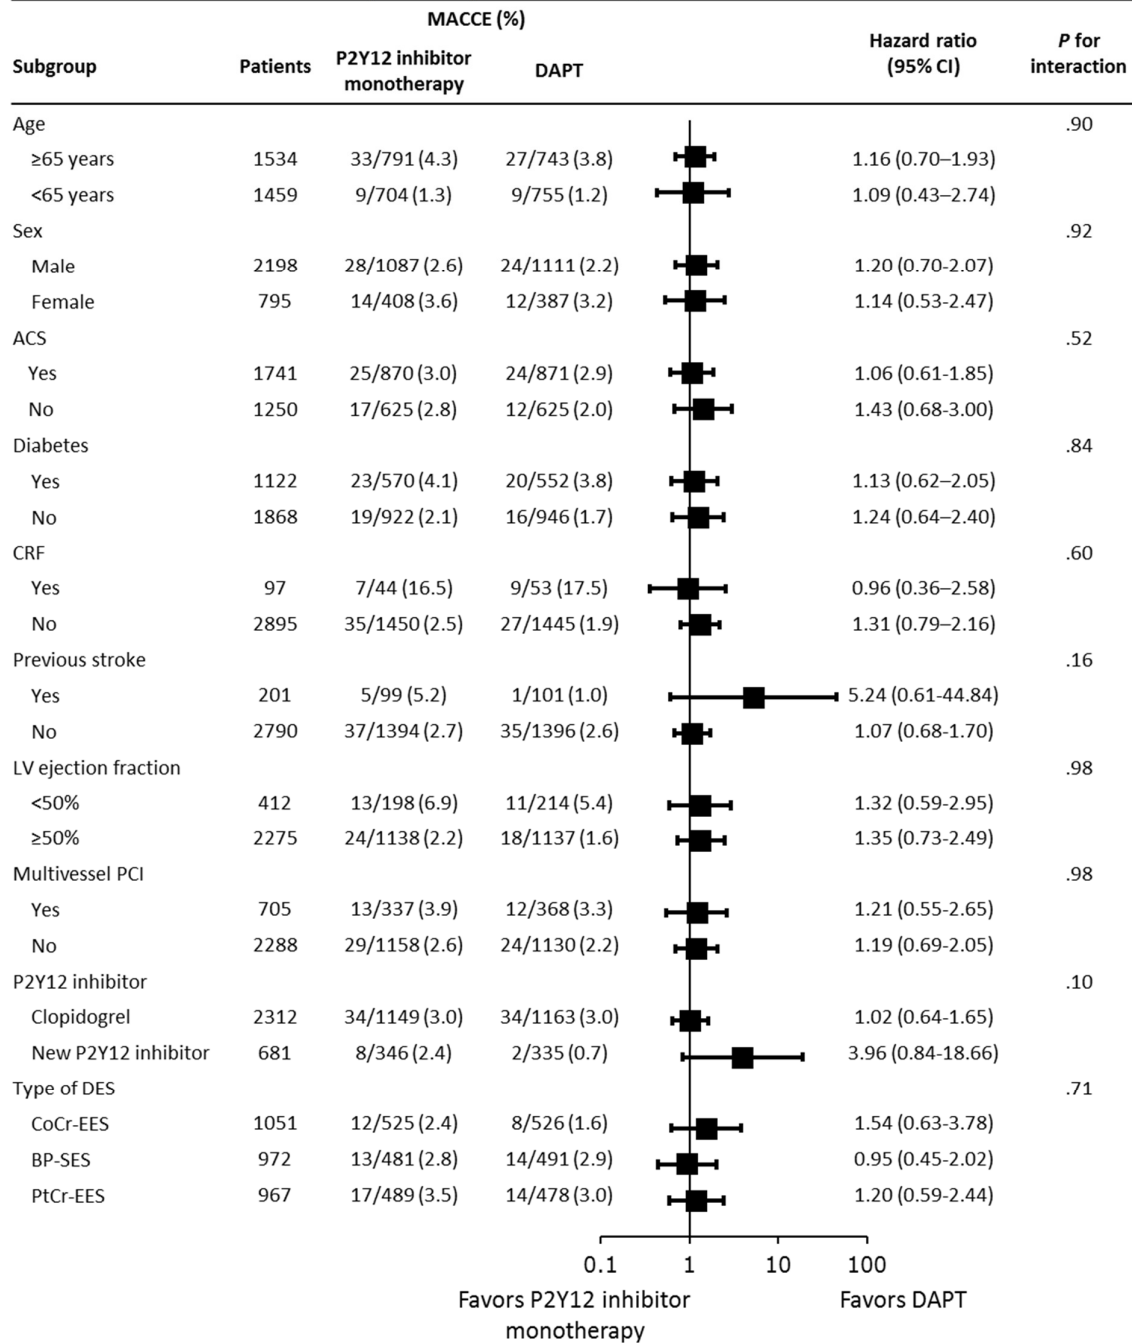

Data are shown as the number of primary end-point events per total number of patients in that subgroup and the event rate. Event rates were based on Kaplan–Meier estimates in time-to-first-event analyses. Hazard ratios are for the patients in the P2Y12 inhibitor monotherapy group. The P value for interaction represents the likelihood of interaction between the variable and the treatment. ACS indicates acute coronary syndrome; BP-SES, bioresorbable polymer- sirolimus-eluting stent; CoCr-EES, cobalt-chromium everolimus eluting stent; CRF, chronic renal failure; DAPT, dual antiplatelet therapy; DES, drug-eluting stents; LV, left ventricular; PCI, percutaneous coronary intervention; PtCr-EES, platinum-chromium everolimus-eluting stent.

## eFigure 7. Subgroup Analyses of BARC type 2-5 Bleeding at 12 Months

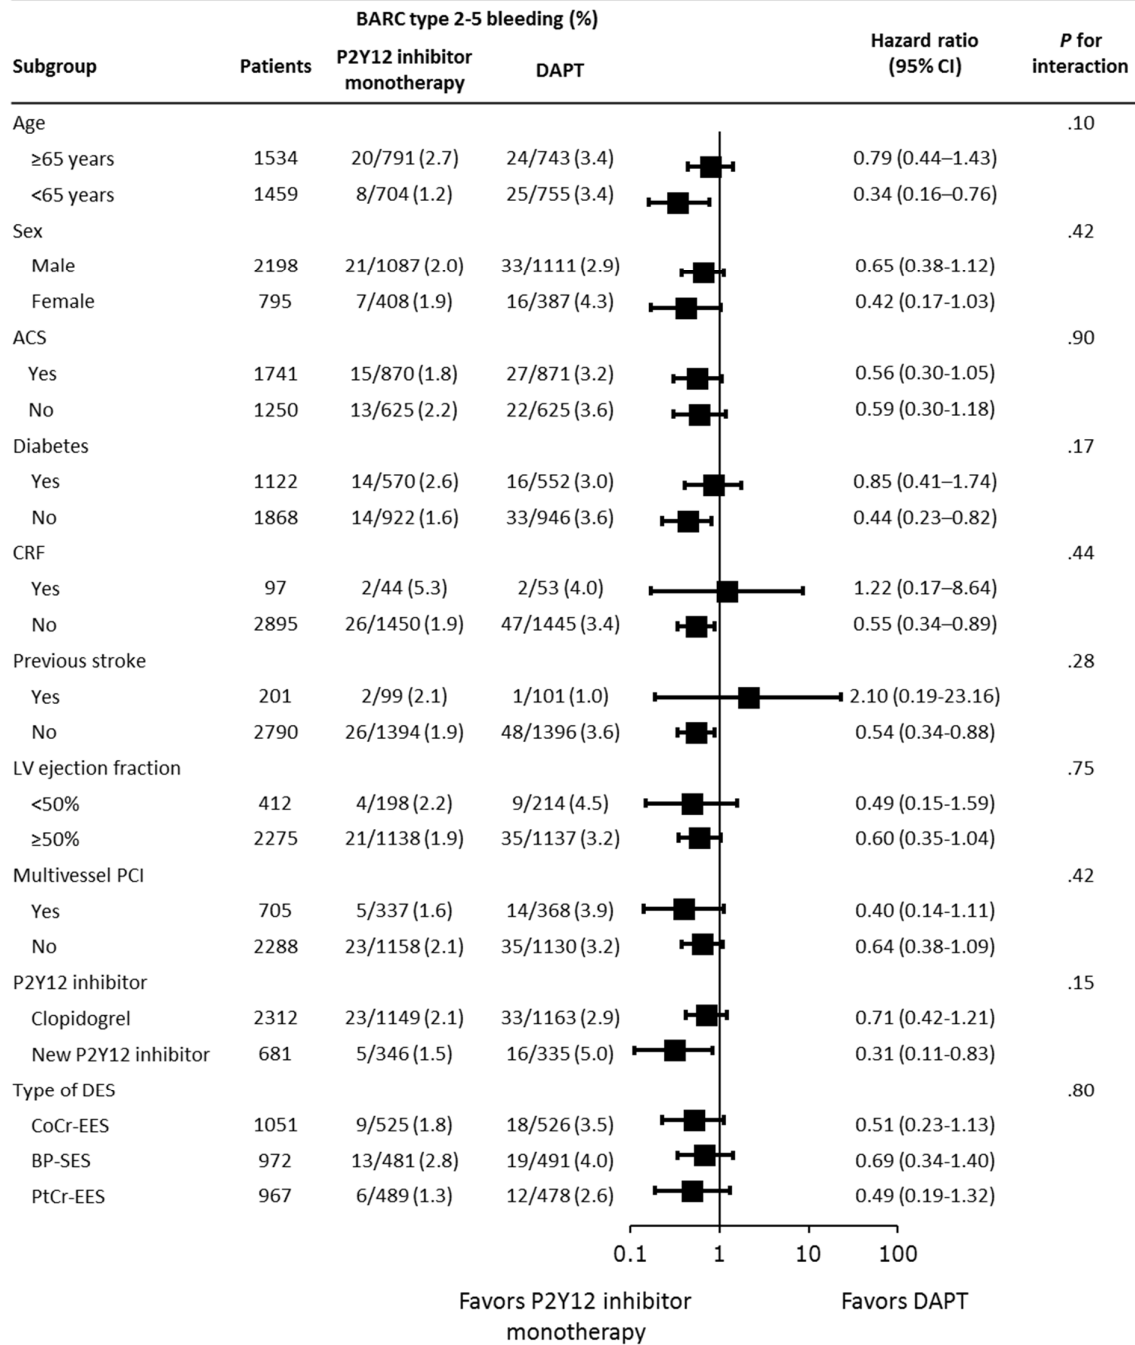

Data are shown as the number of BARC type 2-5 bleeding per total number of patients in that subgroup and the event rate. Event rates were based on Kaplan–Meier estimates in time-to-first-event analyses. Hazard ratios are for the patients in the P2Y12 inhibitor monotherapy group. The P value for interaction represents the likelihood of interaction between the variable and the treatment. ACS indicates acute coronary syndrome; BP-SES, bioresorbable polymer- sirolimus-eluting stent; CoCr-EES, cobalt-chromium everolimus eluting stent; CRF, chronic renal failure; DAPT, dual antiplatelet therapy; DES, drug-eluting stents; LV, left ventricular; PCI, percutaneous coronary intervention; PtCr-EES, platinum-chromium everolimus-eluting stent.
