# Supplementary material
Source: PubMed Central journal article supplement (PMC6593635)
Supplement: jama-321-2428-s003.pdf [file jama-321-2428-s003.pdf]

## **Data Sharing Statement**

Hahn. Effect of P2Y12 Inhibitor Monotherapy vs Dual Antiplatelet Therapy on Cardiovascular Events in Patients Undergoing Percutaneous Coronary Intervention. *JAMA*. Published June 25, 2019. 10.1001/jama.2019.8146

### **Data**

**Data available:** No
